# Supplementary material for: Photochromic macrocyclic complexes of yttrium( iii ) undergoing merocyanine to spiropyran isomerization as models for single-molecule magnet switch candidates
Source: Royal Society of Chemistry journal article supplement (doi:10.1039/d5dt02008e), 2025-01-01
Supplement: d5dt02008e1.pdf [file d5dt02008e1.pdf]

# Photochromic macrocyclic complexes of Yttrium(III) undergoing merocyanine to spiropyran isomerization as models for Single-Molecule Magnets switches candidates

Nour El Beyrouti,<sup>a</sup> Nadège Hamon,<sup>b</sup> Louis Caussin,<sup>a</sup> Yoann Fréroux,<sup>a</sup> Marie Dallon,<sup>a</sup> Thierry Roisnel,<sup>a</sup> Boris Le Guennic,<sup>a</sup> Stéphane Rigaut,<sup>a</sup> Raphaël Tripier,<sup>b</sup> Lucie Norel,<sup>\*a, c</sup>

- a) Univ Rennes, INSA Rennes, CNRS, ISCR (Institut des Sciences Chimiques de Rennes) – UMR 6226, F-35000 Rennes, France.  
b) Univ Brest, UMR-CNRS 6521 CEMCA, F 29200 Brest, France  
c) Institut Universitaire de France

## Electronic Supplementary Information

### Contents

|                                                |    |
|------------------------------------------------|----|
| Materials and methods .....                    | 2  |
| Synthetic procedures and characterization..... | 2  |
| X-Ray Diffraction Analysis.....                | 19 |
| Optical properties.....                        | 22 |
| Theoretical Calculations .....                 | 30 |
| Références .....                               | 33 |

## Materials and methods

Reagents were purchased from ACROS Organics and from Aldrich Chemical Co and used without further purification. DO3AtBu was purchased from CheMatech and TCI Europe. All solvents were dried and distilled prior to use according to standard methods. All the experiments and purifications were carefully processed in the dark. Purifications by flash chromatography were performed on a grace-reveleris equipment and the columns were purchased from Interchim. Analytic HPLC was performed on a Prominence Shimadzu HPLC/LCMS-2020 equipped with a UV SPD-20 A detector. The chromatographic system employs HPLC (Vision HT C18 HL 5  $\mu$  250 $\times$  4.6 mm) with H<sub>2</sub>O and MeCN as eluents (gradient given under the chromatogram) at a flow rate of 1 mL/min and UV detection at 254, 350, and 360 nm. NMR spectra were recorded at the “Services communs” of the University of Brest and at the Institut des Sciences Chimiques de Rennes. <sup>1</sup>H and <sup>13</sup>C NMR spectra were recorded using Bruker Avance 500 (500 MHz), Bruker Avance 400 (400 MHz), or BrukerAMX-3 300 (300 MHz) spectrometers. HRMS analyses were realized on a HRMS Q-ToF MaXis, sources ESI, APCI, APPI, nano-ESI (at the Institute of Organic and Analytic Chemistry – ICOA in Orléans and Centre Régional de Mesures Physiques de l’Ouest in Rennes). X-ray measurements were performed with a crystal mounted on a glass fiber with paratone oil on a Bruker APEX-II (D8 VENTURE Bruker AXS). Absorption measurements were performed in methanol, dichloromethane, and acetonitrile at room temperature using “UV VIS NIR JASCO” spectrometer. Routine UV-vis irradiations were performed in UV cells with a Xenon lamp (with a filter at  $\lambda$  = 380, 450, and 530 nm).

## Synthetic procedures and characterization

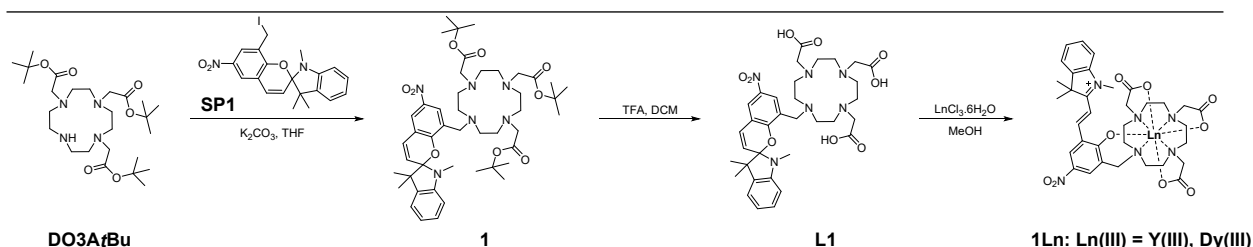

*Scheme S1 : Synthesis of complexes **1Ln**.*

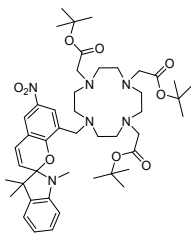

**Synthesis of compound 1 (adapted from reference<sup>1</sup>):** A solution of **DO3AtBu** (37 mg, 73  $\mu$ mol) and  $K_2CO_3$  (30 mg, 218  $\mu$ mol, 3 equiv) in THF (3.2 mL) was stirred at room temperature for 30 min. To this solution was added dropwise a solution of the spiropyran **SP1<sup>2</sup>** (37 mg, 80  $\mu$ mol, 1.1 equiv) in THF (1 mL). The reaction mixture was stirred under reflux for 24h. The  $K_2CO_3$  salts were filtered on cotton and solvents were evaporated to dryness. The residue was then submitted to a chromatography on silica gel (Eluent:  $CH_2Cl_2$ /MeOH 100/1 to 100/3) to give compound **1** (36 mg, 42  $\mu$ mol,  $\gamma$  = 58%) as a pink/red oil.

- <sup>1</sup>H NMR (500 MHz,  $CDCl_3$ ):  $\delta$  8.25 (s, 1H, H2), 7.93 (d,  $J$  = 2.7 Hz, 1H, H4), 7.17 (td,  $J$  = 7.7, 1.1 Hz, 1H, H14), 7.04 (d,  $J$  = 6.8 Hz, 1H, H12), 6.95 (d,  $J$  = 10.4 Hz, 1H, H7), 6.86 (dd,  $J$  = 10.9, 3.9 Hz, 1H, H13), 6.50 (d,  $J$  = 7.7 Hz, 1H, H15), 5.87 (d,  $J$  = 10.3 Hz, 1H, H8), 3.58 (d,  $J$  = 13.2 Hz, 1H, H17a), 3.43 (d,  $J$  = 15.0 Hz, 1H, H17b), from 3.12 to 2.01, 22H, cyclen and 3 \*  $CH_2COOCH_3$ ), 2.70 (s, 3H, N- $CH_3$ ), 1.49 (s, 9H,  $tBu$ ), 1.42-1.41 (2s, 18H,  $tBu$ ), 1.23 (s, 3H,  $CH_3$  gem), 1.16 (s, 3H,  $CH_3$  gem).
- <sup>13</sup>C NMR (125 MHz,  $CDCl_3$ ):  $\delta$  173.7 (C=O), 173.5 (C=O), 172.7 (C=O), 158.4 (C5), 147.2 (C16), 140.4 (C3), 135.6 (C11), 128.8 (C7), 128.1 (C2, C14), 123.4 (C1), 122.2 (4), 121.5 (C8, C12), 119.9 (C13), 119.1 (C6), 107.6 (C9), 106.9 (C15), 82.9 (Cq  $tBu$ ), 82.7 (Cq  $tBu$ ), 82.3 (Cq  $tBu$ ), 56.9 and 55.8 ( $CH_2COOCH_3$  + cyclen), 52.3 (C10), 50.5 (C17), 28.9 (N $CH_3$ ), 27.9 ( $tBu$ ), 27.8 ( $tBu$ ), 25.9 ( $CH_3$  gem), 20.0 ( $CH_3$  gem).
- ESI-HR-MS (positive, MeOH):  $m/z$  calcd. for  $[C_{46}H_{68}N_6NaO_9]^+$ : 871.4939, found: 871.4924,  $[M+Na]^+$ ; calcd. for  $[C_{46}H_{69}N_6O_9]^+$ : 849.5120, found: 849.5109,  $[M+H]^+$ ; calcd. for  $[C_{46}H_{70}N_6O_9]^{2+}$ : 425.2597, found: 425.2595,  $[M+2H]^{2+}$ , 335 and 515 = fragmentation (- $OtBu$ ).

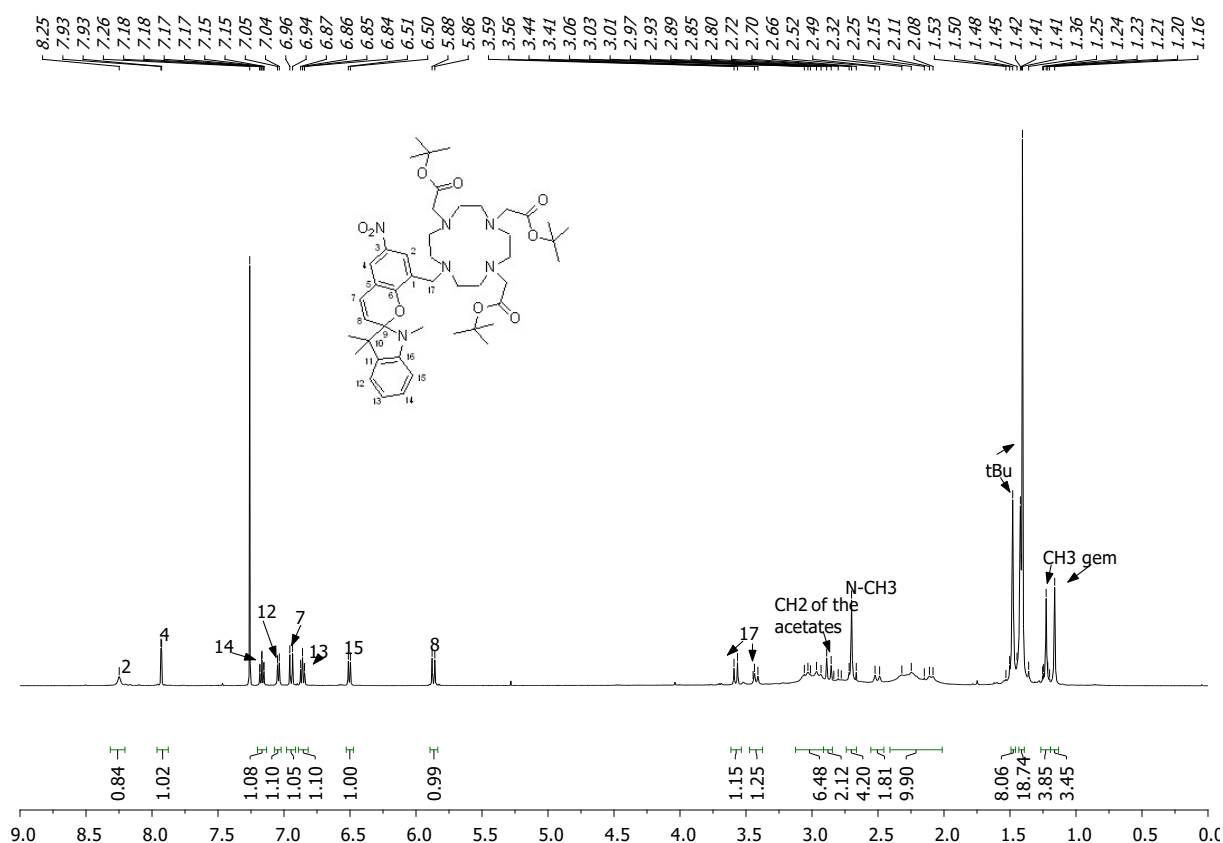

Figure S1 :  $^1\text{H}$  NMR of compound **1** (500 MHz,  $\text{CDCl}_3$ , 298K).

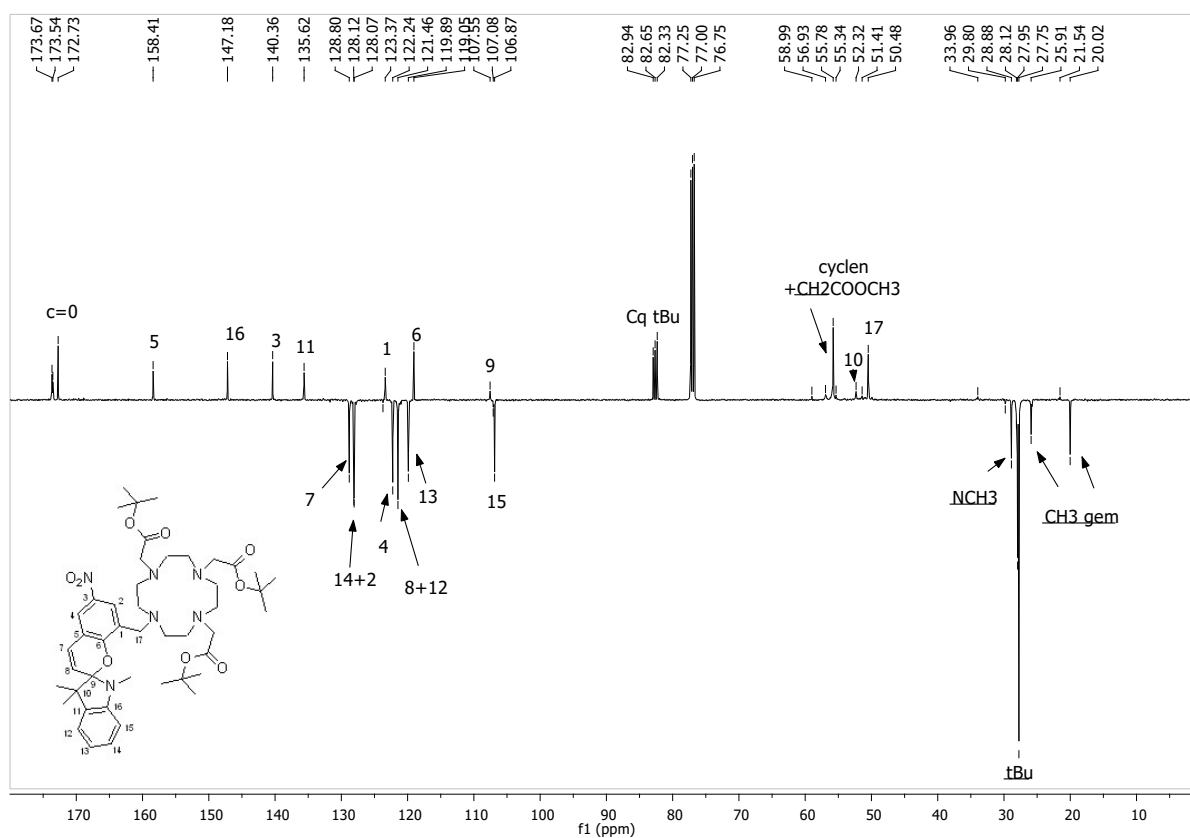

Figure S2:  $^{13}\text{C}$  NMR of compound **1** (125 MHz,  $\text{CDCl}_3$ , 298K).

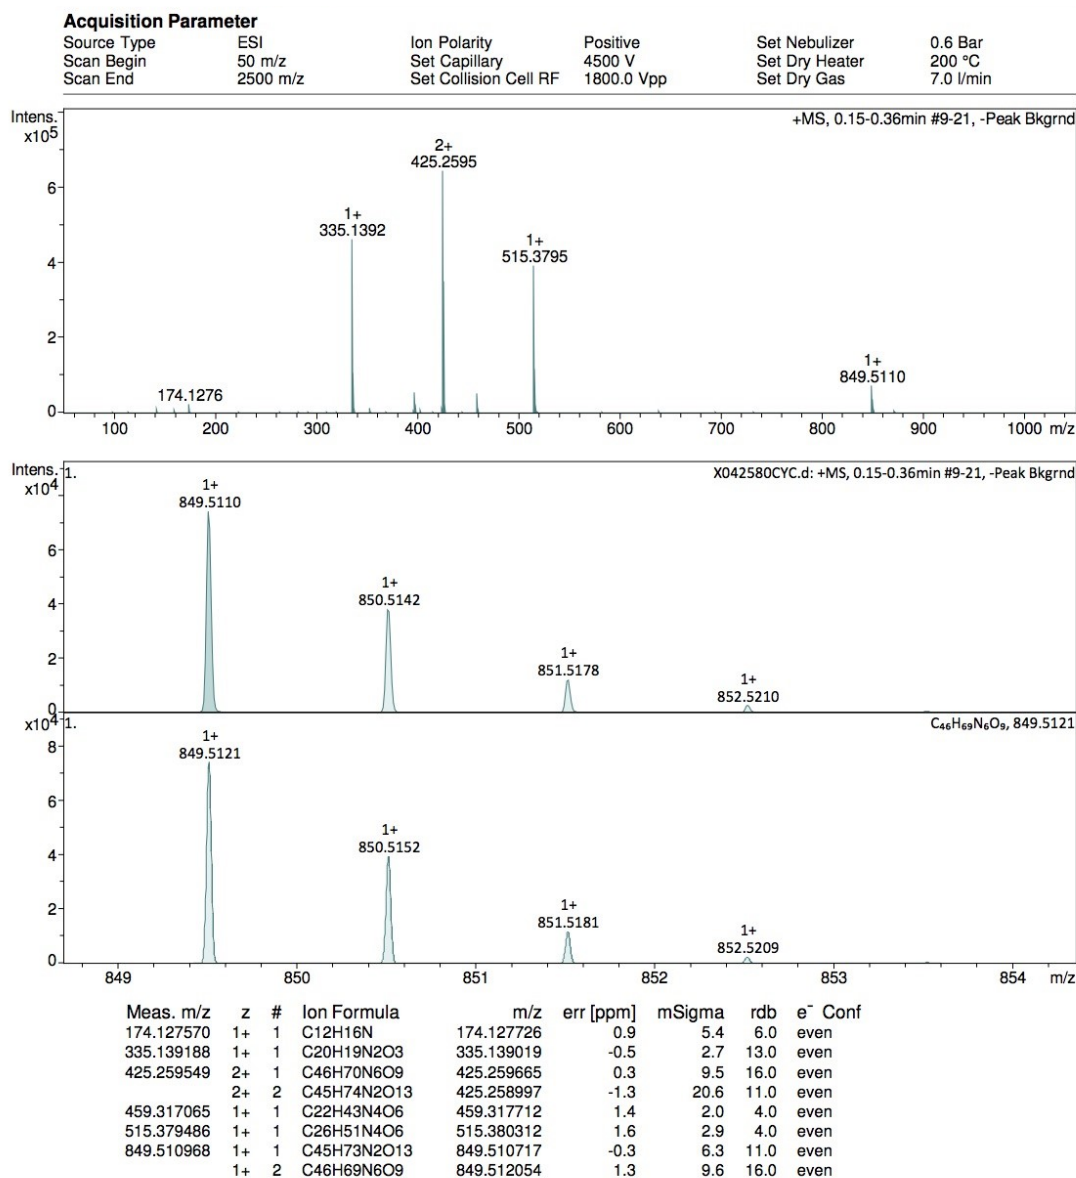

Figure S3: HRMS of compound **1**.

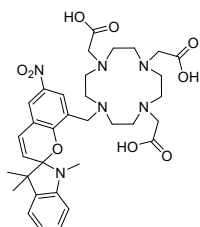

**Synthesis of L1:** To a solution of compound **1** (100 mg, 0.12 mmol) in CH<sub>2</sub>Cl<sub>2</sub> (2.14 mL) was added dropwise TFA (2.14 mL). The reaction mixture was stirred at 40°C for 4 hours and solvents were evaporated to dryness. The residue was dissolved in methanol and solvents were evaporated to dryness. The process was repeated three times. The residue was purified by flash column chromatography on C18-silica gel (Column C18-4g from Interchim, Eluent: H<sub>2</sub>O/ACN 95/5 for 10 min,

then H<sub>2</sub>O/ACN 95/5 to 2/8 for 30 min, flow: 15 mL/min) to give compound **L1** (90 mg) as a red oil. Compound **L1** was then used without further purification in the next step.

- <sup>1</sup>H NMR (CD<sub>3</sub>OD, 300 MHz): Because of the quick isomerization process, the <sup>1</sup>H NMR spectrum was obtained as a mixture of isomers. Therefore, due to its complexity, the spectrum could not be described but is given below. Because of the complexity of the <sup>1</sup>H NMR spectrum, no <sup>13</sup>C NMR was attempted.
- ESI-HR-MS (positive, MeOH): *m/z* calcd. for [C<sub>34</sub>H<sub>45</sub>N<sub>6</sub>O<sub>9</sub>]<sup>+</sup>: 681.3243, found: 681.3229, [M+H]<sup>+</sup>; calcd. for [C<sub>34</sub>H<sub>42</sub>FeN<sub>6</sub>O<sub>9</sub>]<sup>+</sup>: 734.2357, found: 734.2346, [M-2H+Fe]<sup>+</sup>; calcd. for [C<sub>34</sub>H<sub>46</sub>N<sub>6</sub>O<sub>9</sub>]<sup>2+</sup>: 341.1658, found: 341.1658, [M+2H]<sup>2+</sup>; calcd. for [C<sub>34</sub>H<sub>43</sub>FeN<sub>6</sub>O<sub>9</sub>]<sup>2+</sup>: 367.6215, found: 367.6214, [M-H+Fe]<sup>2+</sup>, 335 and 347 = fragmentations.

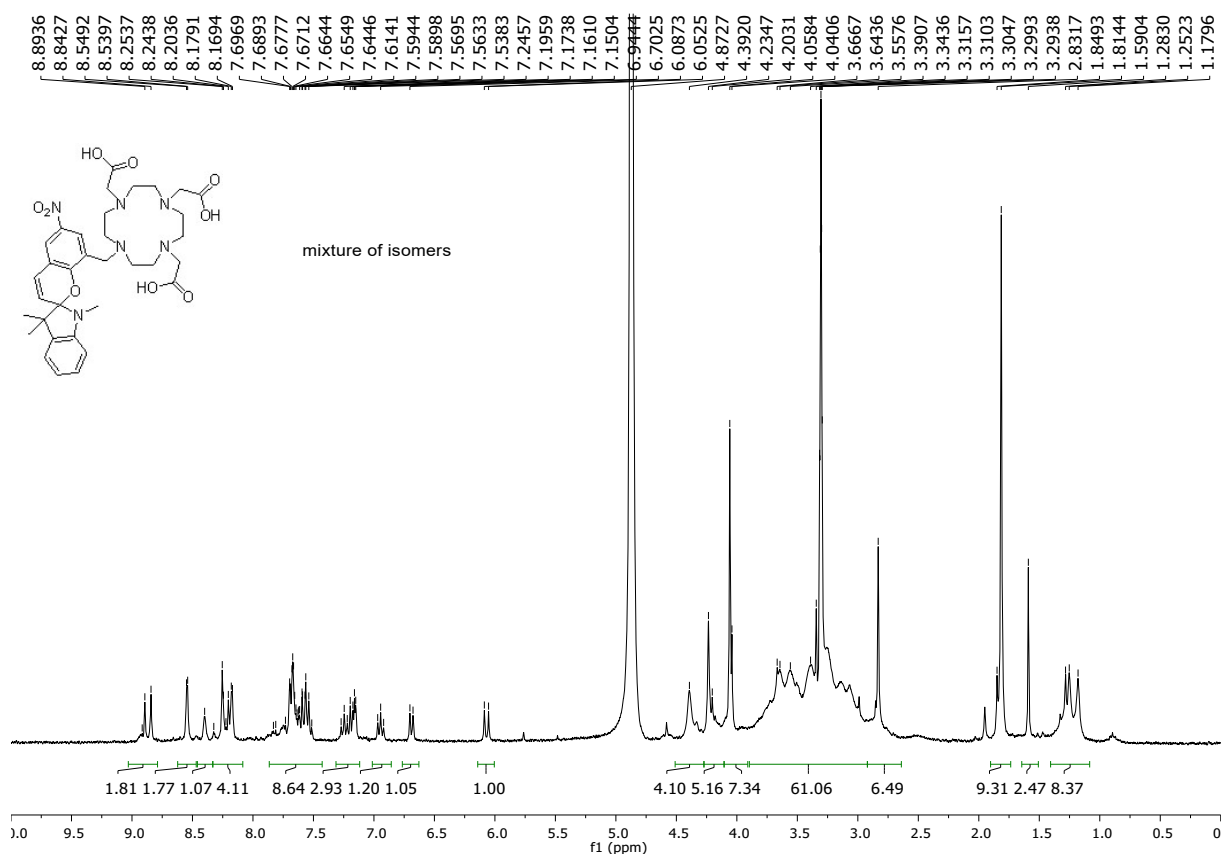

Figure S4: <sup>1</sup>H NMR (D<sub>2</sub>O, 300 MHz, 298 K) of compound **L1**.

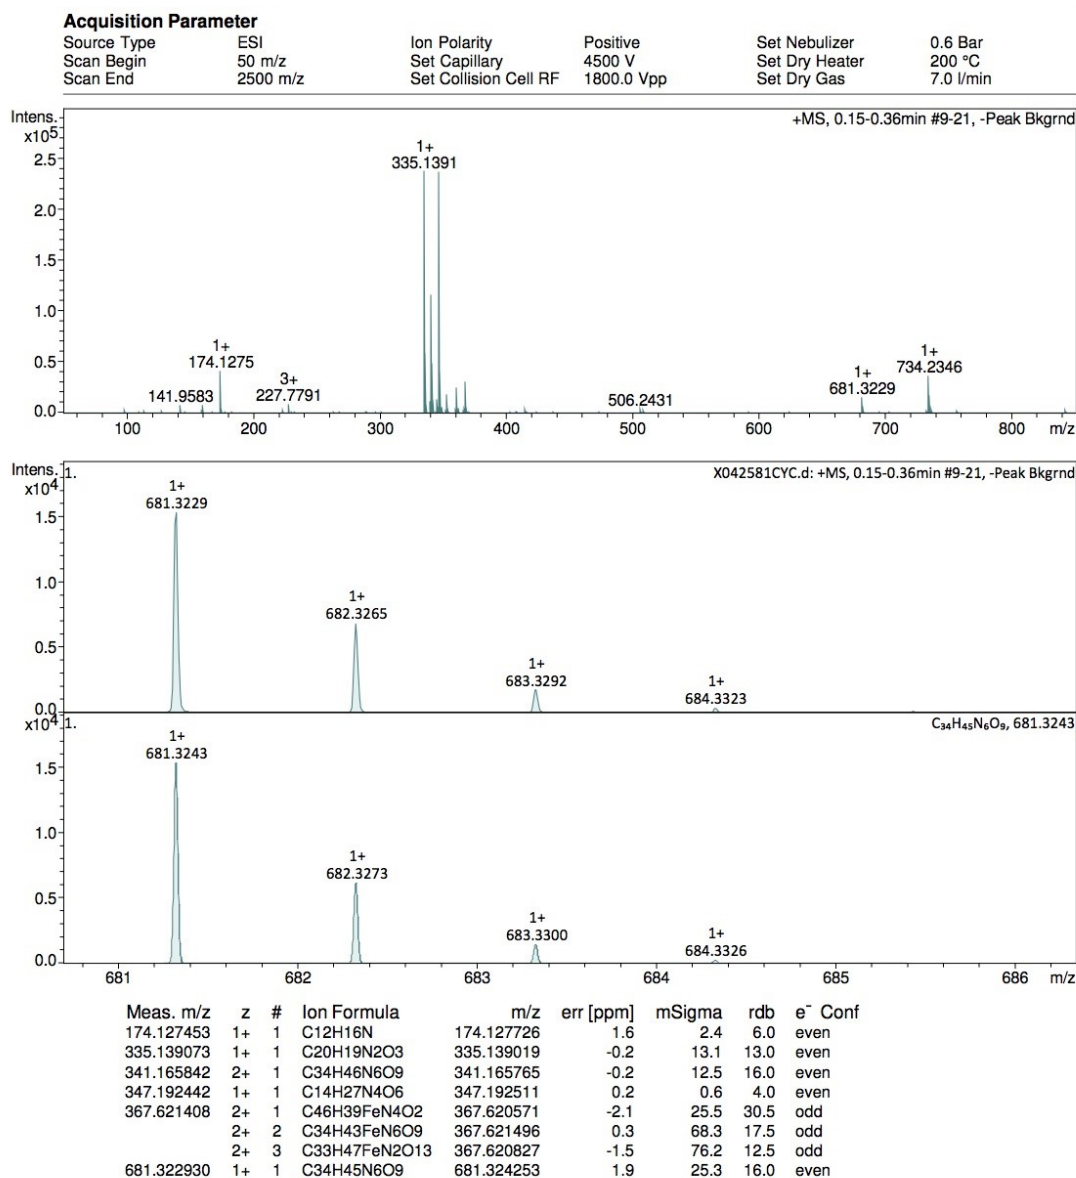

Figure S5: HRMS of compound **L1**

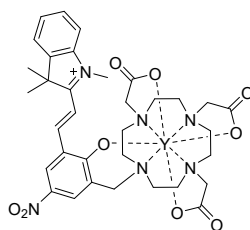

**Synthesis of 1Y:** To a solution of **L1** (32 mg, 47  $\mu$ mol), in MeOH (10 mL) was added YCl<sub>3</sub>·6H<sub>2</sub>O (43 mg, 141  $\mu$ mol, 3 equiv). The reaction mixture was stirred at room temperature for 2.5 days before evaporation of solvents to dryness. Purification of the crude by flash chromatography on C18-silica gel (Column C18-4g from Interchim, Eluent: H<sub>2</sub>O/ACN 95/5 for 10 min, then H<sub>2</sub>O/ACN 95/5 to 2/8 for 30 min, flow: 15 mL/min) gave **1Y** (31 mg, 40  $\mu$ mol,  $\gamma$  = 86%) as a red dry film of amorphous solid.

- ESI-HR-MS (positive, MeOH):  $m/z$  calcd. for  $[C_{34}H_{42}N_6O_9Y]^+$ : 767.2066, found: 767.2060,  $[M+H]^+$ ; calcd. for  $[C_{34}H_{43}N_6O_9Y]^{2+}$ : 384.1069, found: 384.1065,  $[M+2H]^{2+}$ .
- $^1H$  NMR (500 MHz,  $CD_3OD$ ):  $\delta$  8.63 (d,  $J = 3.0$  Hz, 1H), 8.61 (bd, 1H, this signal tends to disappear upon standing in  $CD_3OD$  under 450 nm irradiation), 8.25 (d,  $J = 15.9$  Hz, 1H, this signal transforms into a singlet upon standing in  $CD_3OD$  under 450 nm irradiation), 8.19 (d,  $J = 3.0$  Hz, 1H), 7.76 (d,  $J = 7.1$  Hz, 1H), 7.72 (d,  $J = 7.1$  Hz, 1H), 7.60 (m, 2H), 4.27 (s, 3H), 3.8-2.2(m, 24H), 1.83 (m, 6H).

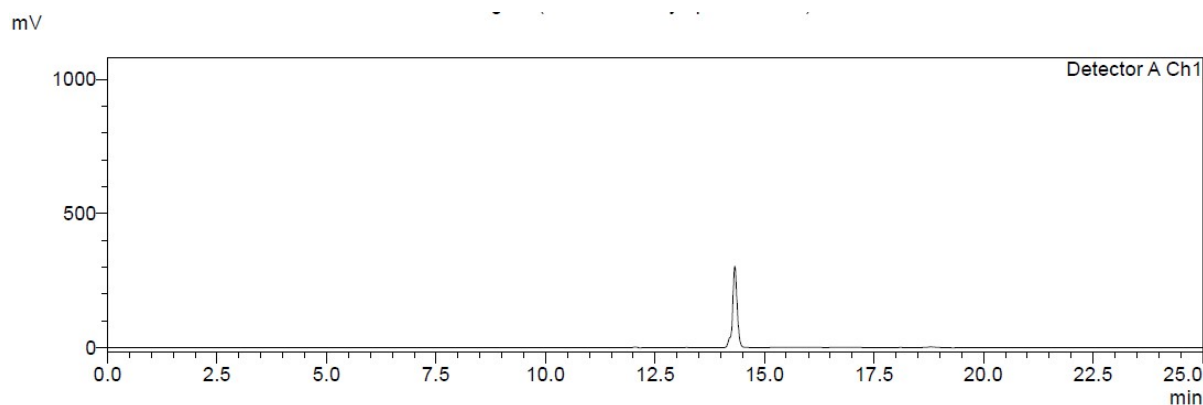

Figure S6: Analytical HPLC of the **1Y** complex. Column: Vision HT C18 HL 5  $\mu$  250 $\times$  4.6 mm. Gradient: 100%  $H_2O$  0 $\rightarrow$ 5 min, 0 $\rightarrow$ 90% ACN 5-15 min, 90% ACN 15 $\rightarrow$ 20 min, 100%  $H_2O$  20 $\rightarrow$ 25min. Flow: 1mL/min. Retention time = 14.332 min. Purity = 98%.

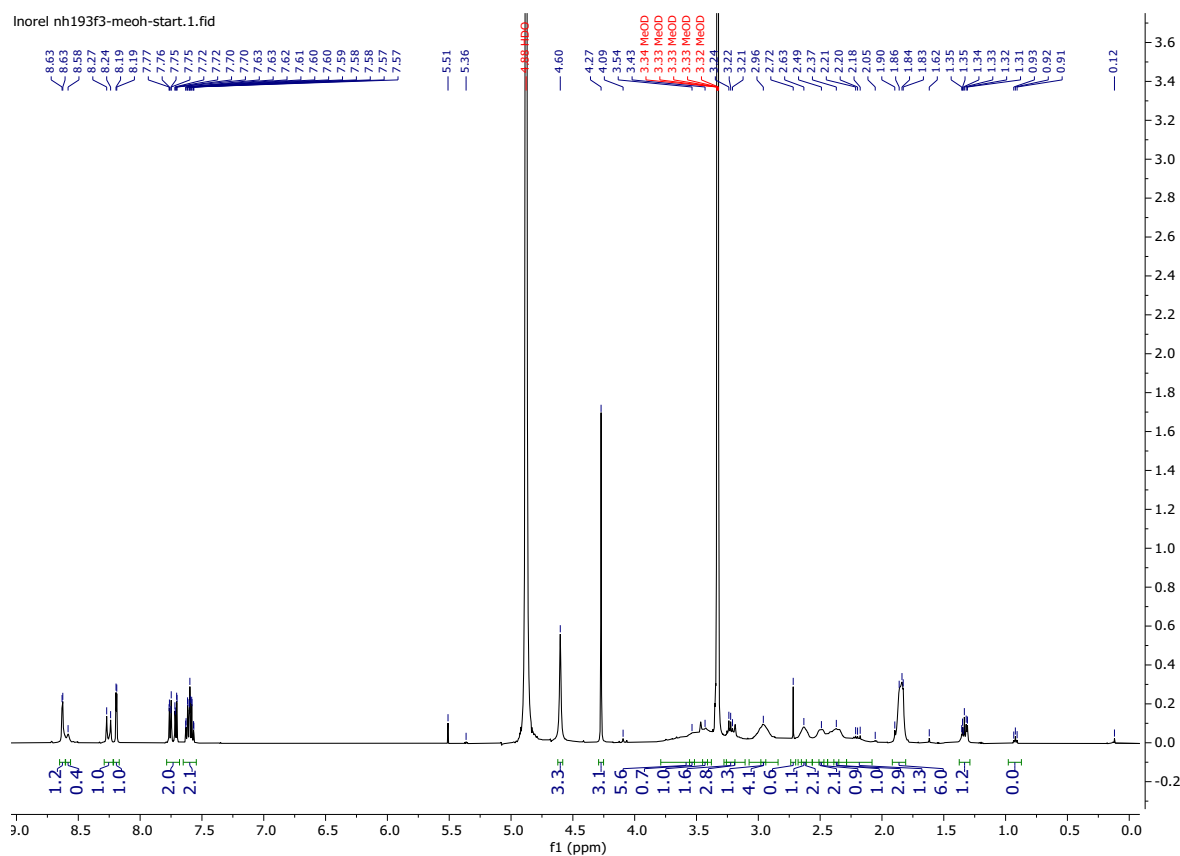



Figure S7:  $^1\text{H}$  NMR ( $\text{CD}_3\text{OD}$ , 500 MHz, 298 K) of compound **1Y**.

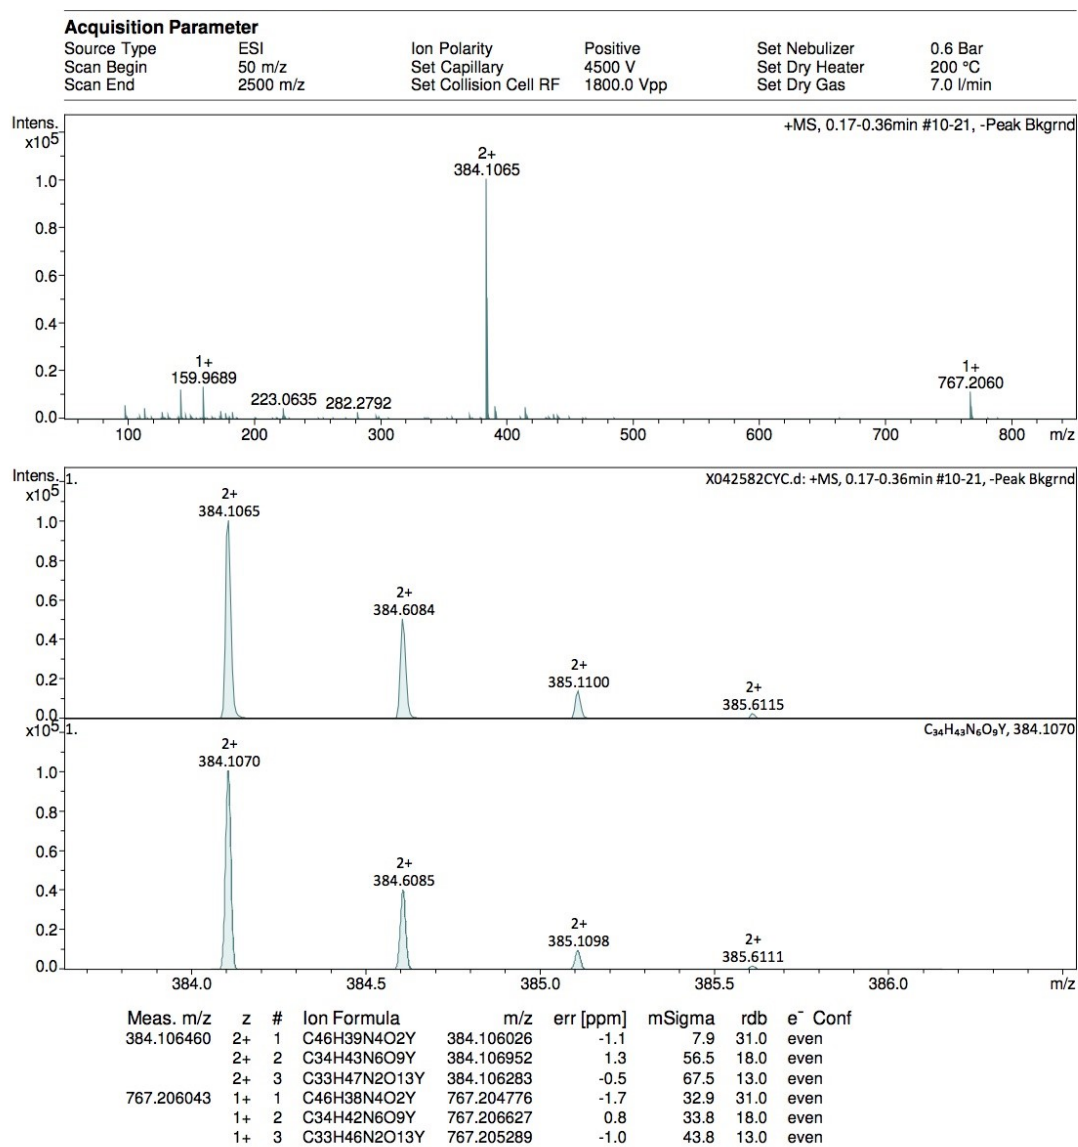

Figure S8: HRMS of compound **1Y**.

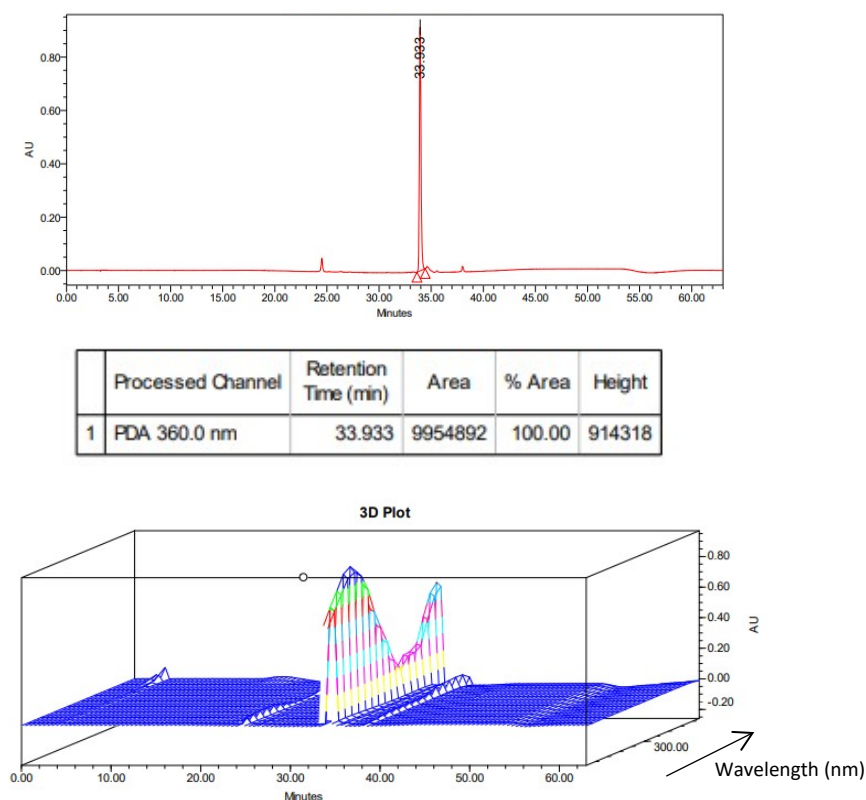

Figure S9: HPLC-UV-DAD analysis of compound **1Y**. Column: MODULO-CART QS UPTISPHERE 5 ODB 250x 4.6 mmUP50DB-25QS. Gradient: 5% MeOH – 95 % H<sub>2</sub>O. Injection volume 20.00 ul.  $\lambda$  = 360 nm. Retention time = 33.933 min, purity = 92 %.

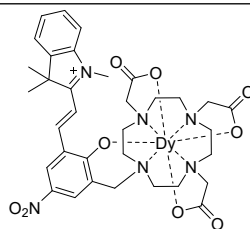

**Synthesis of 1Dy:** To a solution of **L<sub>1</sub>** (59 mg, 87  $\mu$ mol), in MeOH (10 mL) was added DyCl<sub>3</sub>·6H<sub>2</sub>O (49 mg, 130  $\mu$ mol, 1.5 equiv). The reaction mixture was stirred at room temperature for 4 days before evaporation of solvents to dryness. Purification of the crude by flash chromatography on C18-silica gel (Column C18-4g from Interchim, Eluent: H<sub>2</sub>O for 10 min, H<sub>2</sub>O/ACN 100/0 to 0/100 for 30 min, 100% ACN for 10 min, flow: 10 mL/min) gave **1Dy** (49 mg, 58  $\mu$ mol,  $\gamma$  = 68%) as an orange dry film of amorphous solid.

- ESI-HR-MS (positive, MeOH):  $m/z$  calcd. for [C<sub>34</sub>H<sub>43</sub>DyN<sub>6</sub>O<sub>9</sub>]<sup>+</sup>: 421.6186 , found: 421.6192 , [M+2H]<sup>2+</sup>; calcd. for [C<sub>34</sub>H<sub>42</sub>DyN<sub>6</sub>O<sub>9</sub>]<sup>+</sup>: 842.2299 , found: 842.2315, [M+H]<sup>+</sup>;  $m/z$  174 = fragmentation.

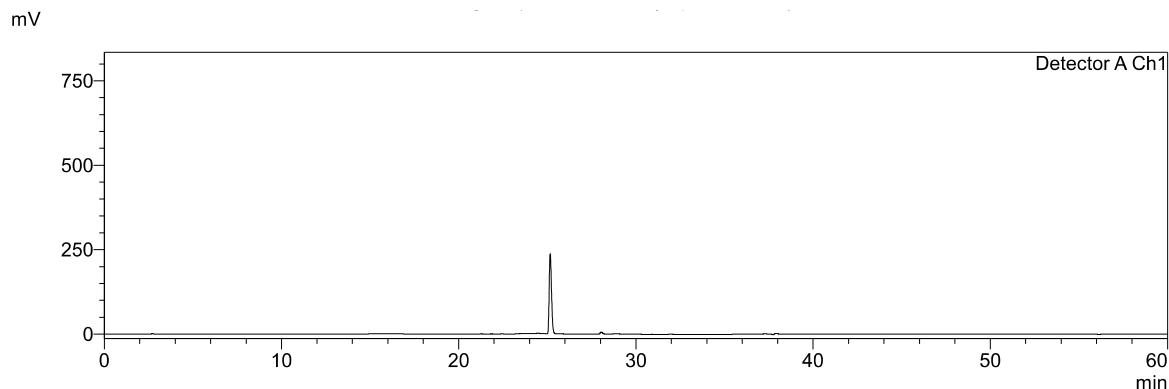

Figure S10: Analytical HPLC of the **1Dy** complex. Column: Vision HT C18 HL 5  $\mu$  250 $\times$ 4.6 mm. Gradient: H<sub>2</sub>O/ACN 98/2 0  $\rightarrow$  8 min, 2  $\rightarrow$  80% ACN 8  $\rightarrow$  38 min, 80% ACN 38  $\rightarrow$  48 min, 80  $\rightarrow$  2% ACN 48  $\rightarrow$  53 min, H<sub>2</sub>O/ACN 98/2 53  $\rightarrow$  63 min. Flow: 1mL/min. Retention time = 25.163 min, purity = 95%.

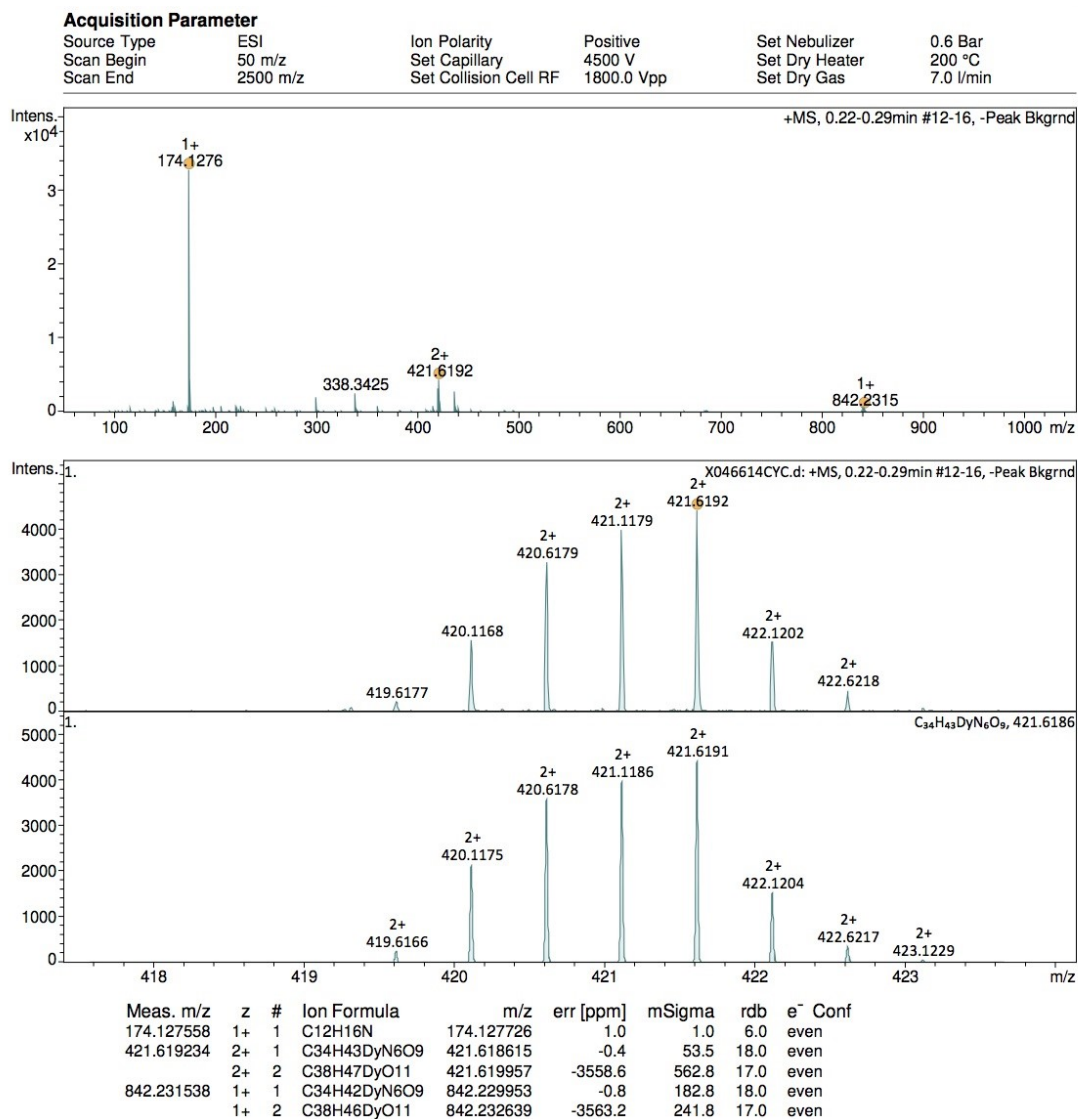

Figure S11: HRMS of compound **1Dy**.

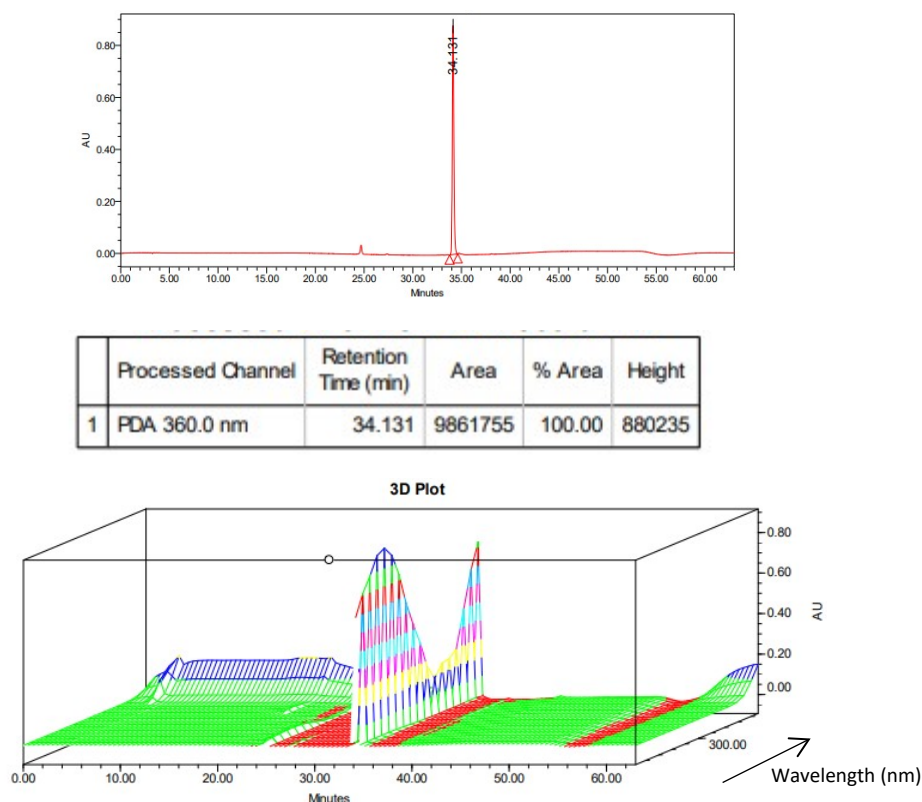

Figure S12: HPLC-UV-DAD analysis of compound **1Dy**. Column: MODULO-CART QS UPTISPHERE 5 ODB 250x 4.6 mmUP50DB-25QS. Gradient: 5% MeOH – 95 % H<sub>2</sub>O. Injection volume 20.00 ul.  $\lambda$  = 360 nm. Retention time = 34.131 min, purity = 92 %.

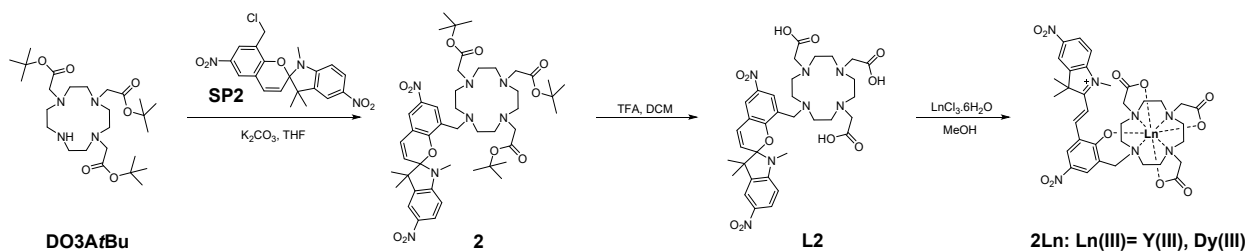

Scheme S2 : Synthesis of complexes **2Ln**.

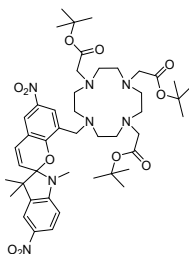

**Synthesis of 2:** Compound **2** was prepared following literature procedure but starting with the chloro substituted **SP2** rather than from the iodo- one.<sup>3</sup> A solution of commercially available tri-*tert*-butyl

2,2',2''-(1,4,7,10-tetraazacyclododecane-1,4,7-triyl)triacetate (0.225 g, 0.437 mmol, 1 eq) and dry potassium carbonate (0.181 g, 1.31 mmol, 3 eq) in 19 mL of dry THF was stirred in a round bottom flask under argon for 30 min. A solution of compound **SP2** (0.20 g, 0.481 mmol) in 6 mL of dry THF was introduced to the flask dropwise. The mixture was refluxed overnight under inert atmosphere. After cooling to room temperature, the solution was filtered over a pad of cotton to remove the residual salt. The solvent was removed by the rotary evaporator. The crude product was purified over silica column chromatography with dichloromethane: methanol (100:0 to 93:7%) as eluent. Compound **2** was obtained as yellowish to orange solid with a yield of 40 % (0.156 g). This yield is lower than what is reported in literature for similar compounds, probably due to the use of different leaving group on the **SP2** (chloro rather than iodo).

- $^1\text{H}$  NMR (300 MHz,  $\text{CDCl}_3$ ):  $\delta$  (ppm) = 8.32 (s, 1H), 8.18 (dd,  $J$  = 8.6, 2.0 Hz, 1H), 7.93 (d,  $J$  = 17.1 Hz, 2H), 7.03 (d,  $J$  = 10.4 Hz, 1H), 6.62 (d,  $J$  = 8.7 Hz, 1H), 5.85 (d, 9 Hz, 1H), 3.56 (m, 2H), 3.15 – 1.90 (m, 32H), 1.38 (s, 21H), 1.26 (s, 3H), 1.18 (s, 3H).
- $^{13}\text{C}$  NMR (126 MHz,  $\text{CDCl}_3$ ):  $\delta$  (ppm) = 173.7, 173.3, 172.6, 157.2, 152.4, 140.9, 140.8, 136.4, 129.5, 128.2, 126.4, 123.6, 122.4, 120.0, 118.5, 118.0, 106.6, 105.9, 83.0, 82.4, 56.9, 55.7, 51.9, 50.4, 46.7, 43.6, 33.6, 29.1, 27.8, 27.7, 25.8, 19.8.

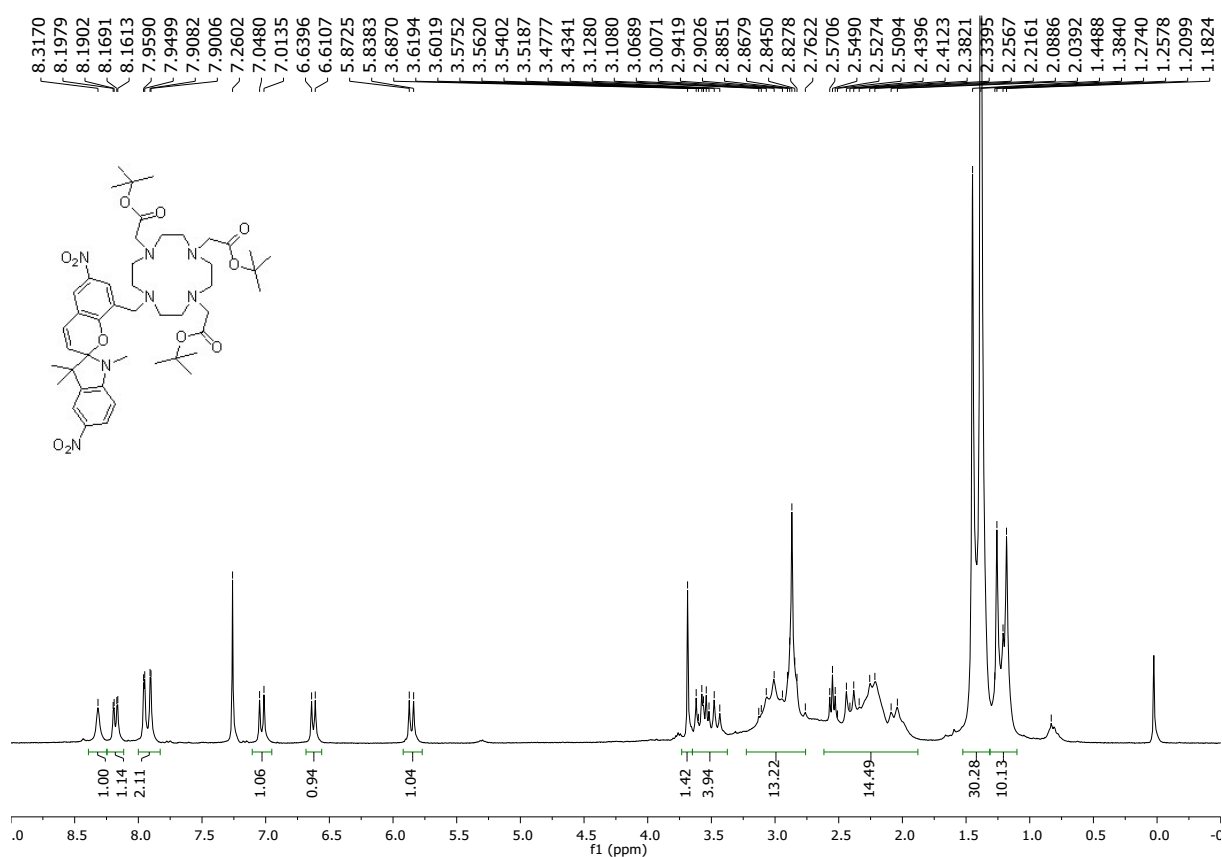

Figure S13 :  $^1\text{H}$  NMR of compound **2** ( $\text{CDCl}_3$ , 300 MHz, 298K).

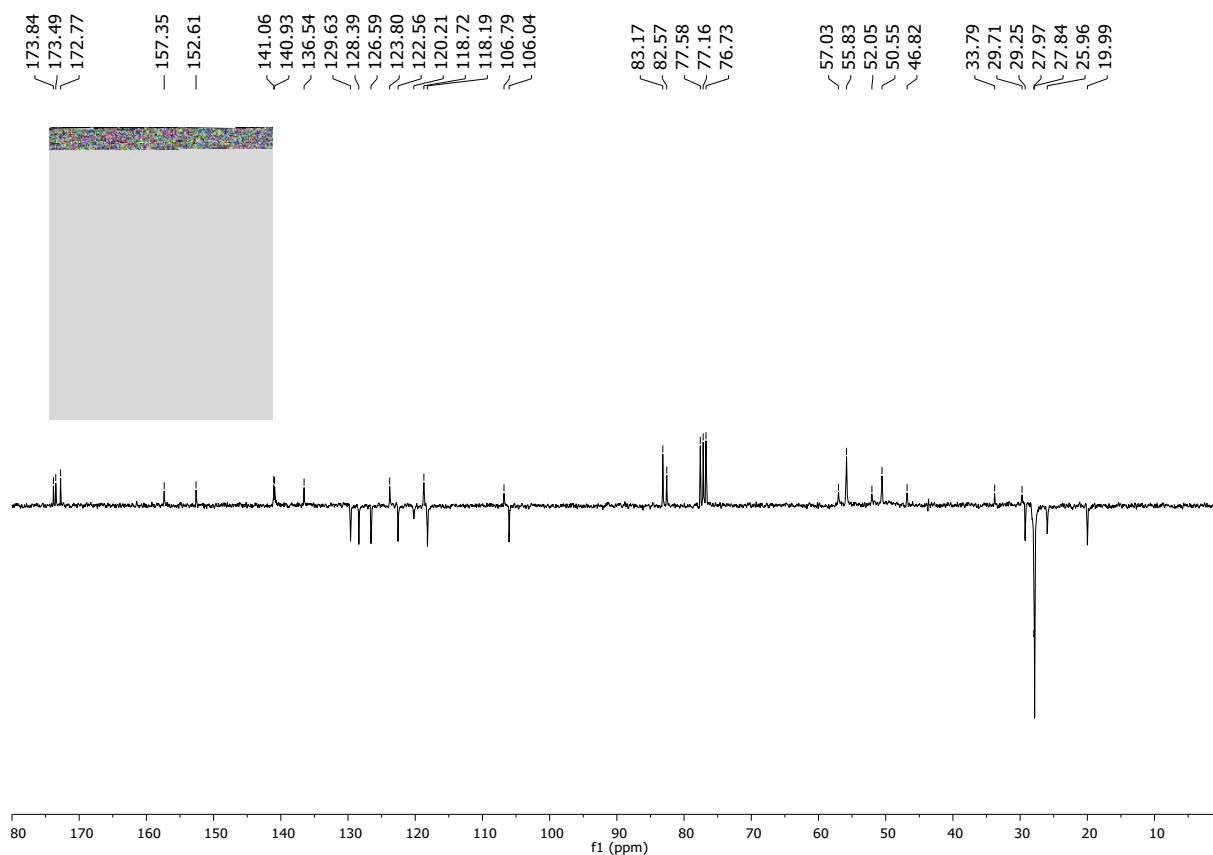

Figure S14 :  $^{13}\text{C}$  NMR of compound **2** ( $\text{CDCl}_3$ , 126 MHz, 298K).

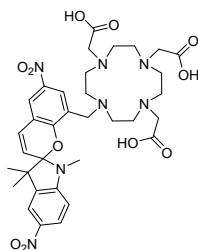

**Synthesis of L2:** Compound **L2** was synthesized as described in literature.<sup>3</sup> The compound was never isolated pure due to the presence of residual TFA salts. It was used directly for the next step, and this did not affect the complexation step. The compound was obtained as dark pink solid.

- $^1\text{H}$  NMR (400 MHz,  $\text{CD}_3\text{OD}$ ):  $\delta$  (ppm) = 8.45 (d,  $J$  = 2.4 Hz, 1H), 8.30 (dd,  $J$  = 4, 8 Hz, 2H), 8.06 (d,  $J$  = 2.1 Hz, 1H), 7.25 (d,  $J$  = 10.5 Hz, 1H), 6.87 (d,  $J$  = 8.7 Hz, 1H), 6.13 (d,  $J$  = 10.4 Hz, 1H), 3.02 (s, 3H), 1.31 (s, 3H), 1.24 (s, 3H).
- $^{13}\text{C}$  NMR (126 MHz,  $\text{CD}_3\text{OD}$ ):  $\delta$  (ppm) = 157.6, 151.9, 141.1, 140.6, 136.2, 129.0, 128.7, 125.7, 124.0, 120.5, 119.8, 117.7, 108.2, 108.2, 105.3, 51.9, 50.9, 49.6, 28.8, 27.4, 23.9, 17.9.

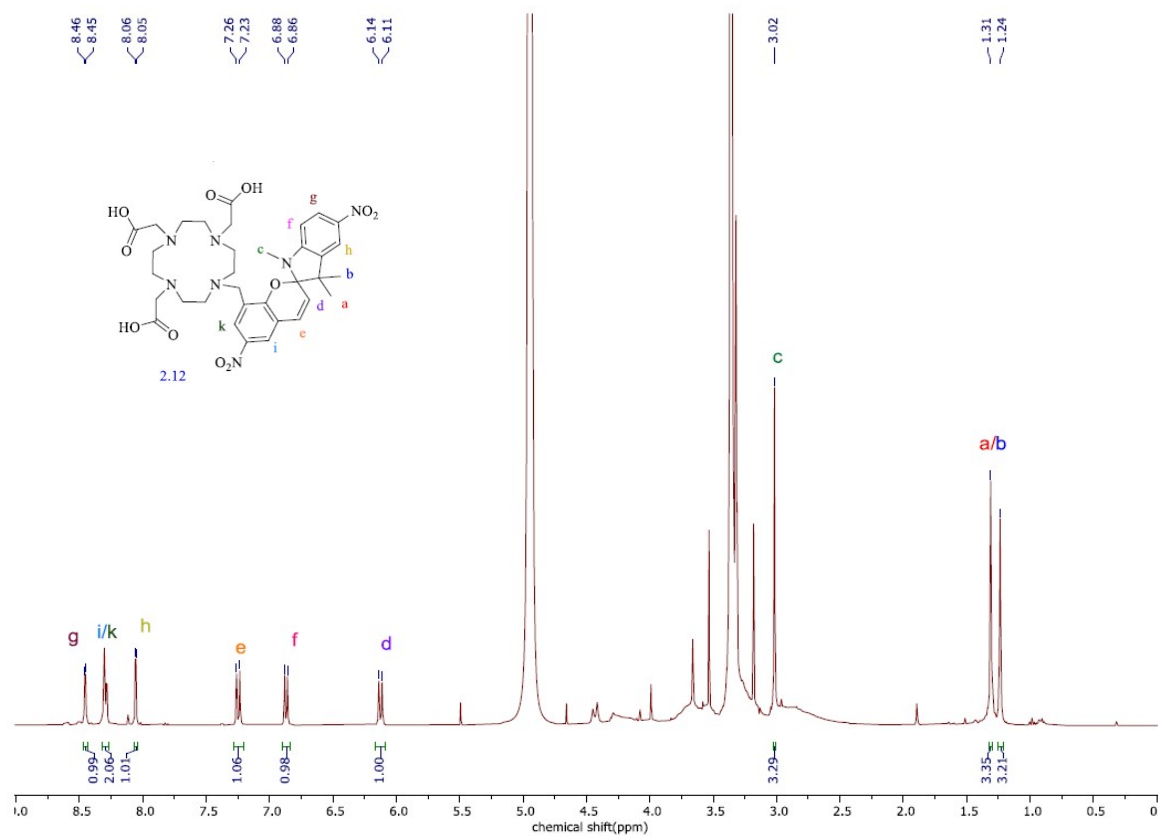

Figure S15 :  $^1\text{H}$  NMR of compound **L2** ( $\text{CD}_3\text{OD}$ , 400 MHz, 298K).

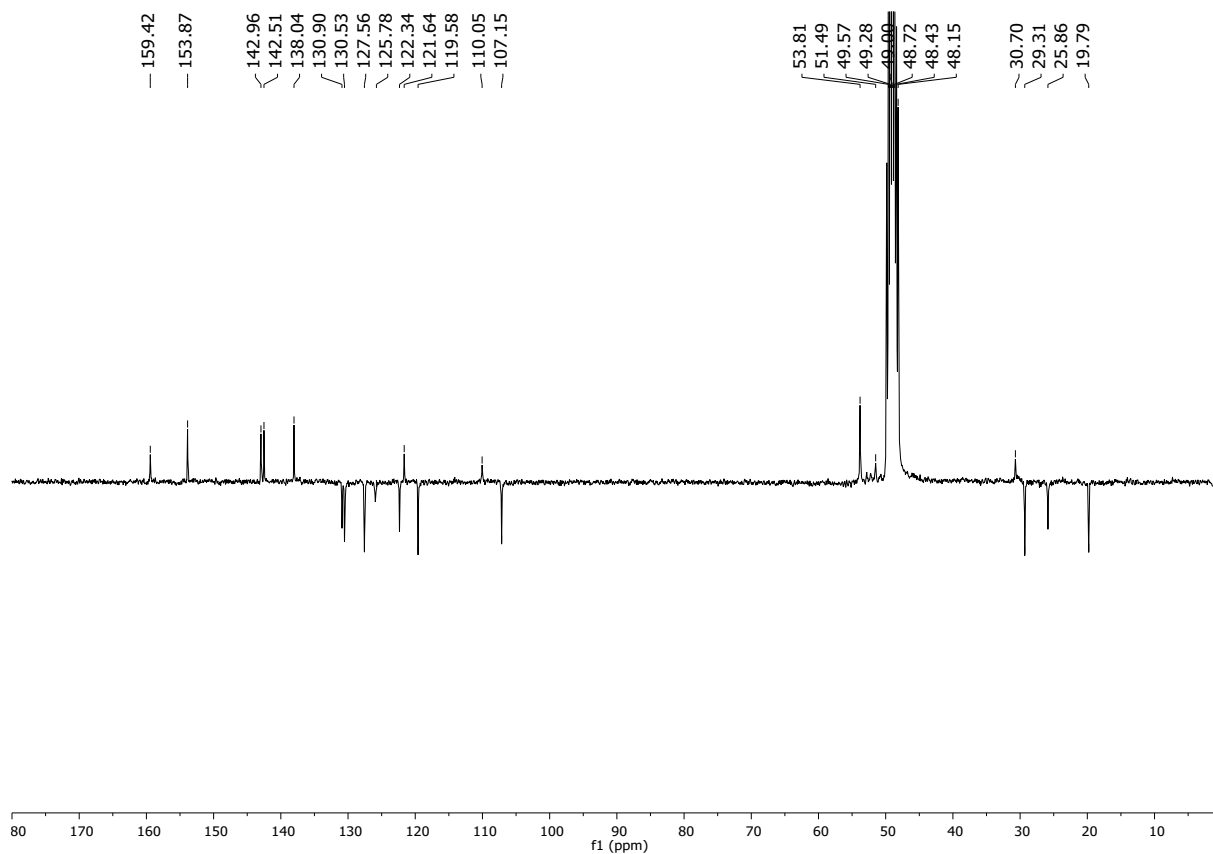

Figure S16 :  $^{13}\text{C}$  NMR of compound **L2** ( $\text{CD}_3\text{OD}$ , 126 MHz, 298K).

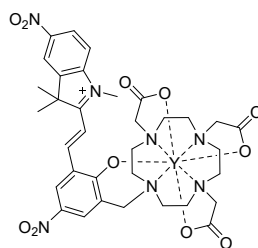

**Synthesis of compound 2Y:** Into a solution of **L2** (0.202 g, 0.278 mmol, 1 eq) in 20 mL of methanol was added  $\text{YCl}_3 \cdot 6\text{H}_2\text{O}$  (0.085 g, 0.278 mmol, 1eq). The reaction mixture was refluxed overnight before evaporation of solvents to dryness. The crude product was purified by silica column chromatography using  $\text{CH}_2\text{Cl}_2$ :  $\text{CH}_3\text{OH}$ :  $\text{H}_2\text{O}$  (1:4:1) as eluent to give compound **2Y** (0.149 g, % yield = 66 %) as a red solid.

- $^1\text{H}$  NMR (400 MHz,  $\text{CD}_3\text{OD}$ ):  $\delta$  (ppm) = 8.6-8.7 (m, 3H), 8.49 (dd,  $J$  = 8.8, 2.2 Hz, 1H), 8.38 (d,  $J$  = 16.0 Hz, 1H), 8.20 (d,  $J$  = 3.1 Hz, 1H), 7.93 (d,  $J$  = 8.9 Hz, 1H), 4.7-2.1 (m, 24H), 4.28 (s, 3H), 1.90 (bs, 6H).
- ESI-HR-MS (positive, MeOH):  $m/z$  calcd. for  $[\text{C}_{34}\text{H}_{41}\text{N}_7\text{O}_{11}\text{Y}]^+$ : 812.19171, found: 812.1918.
- FT-IR ( $\text{cm}^{-1}$ , ATR): 1593 (C=O), 1514, 1310 (C=C), 1241, 1205, 1107, 1081, 968, 934, 903.

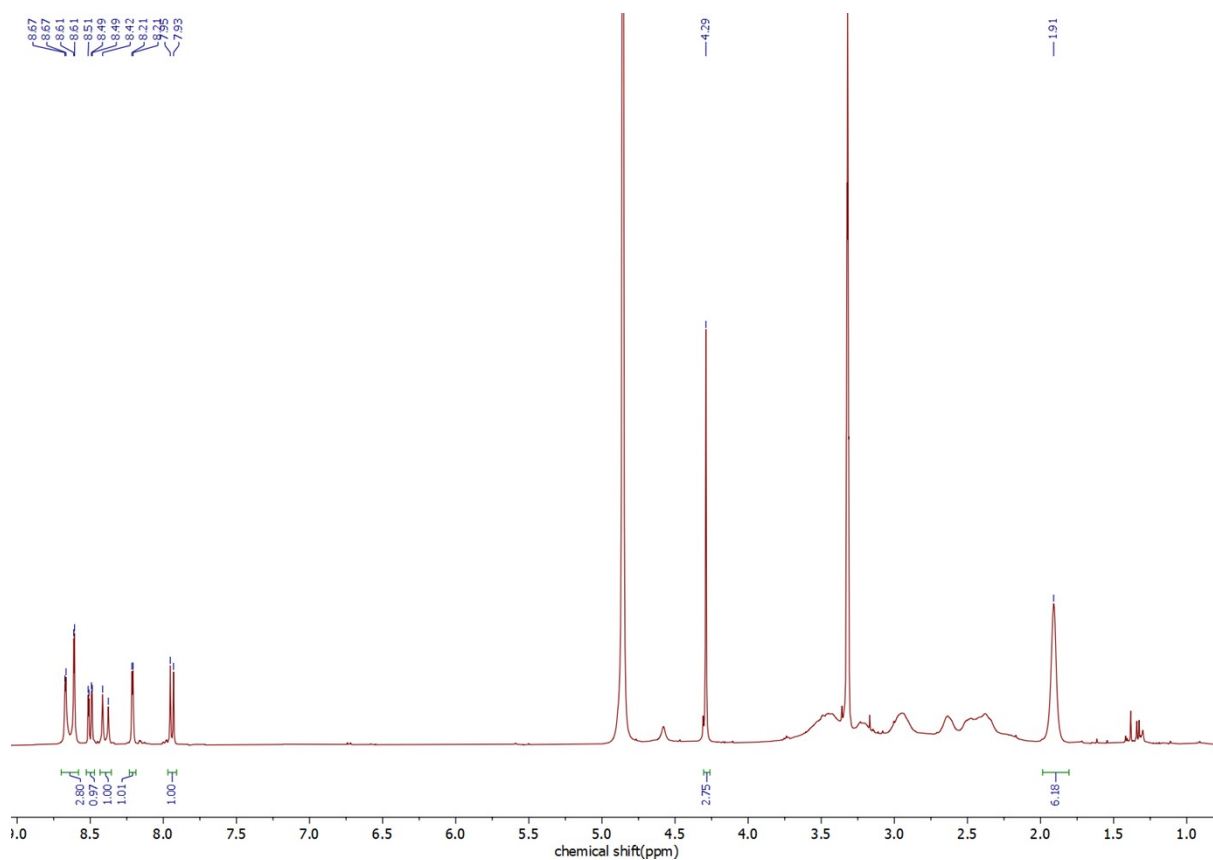

Figure S17:  $^1\text{H}$  NMR of compound **2Y** (400 MHz,  $\text{CD}_3\text{OD}$ , 298K).



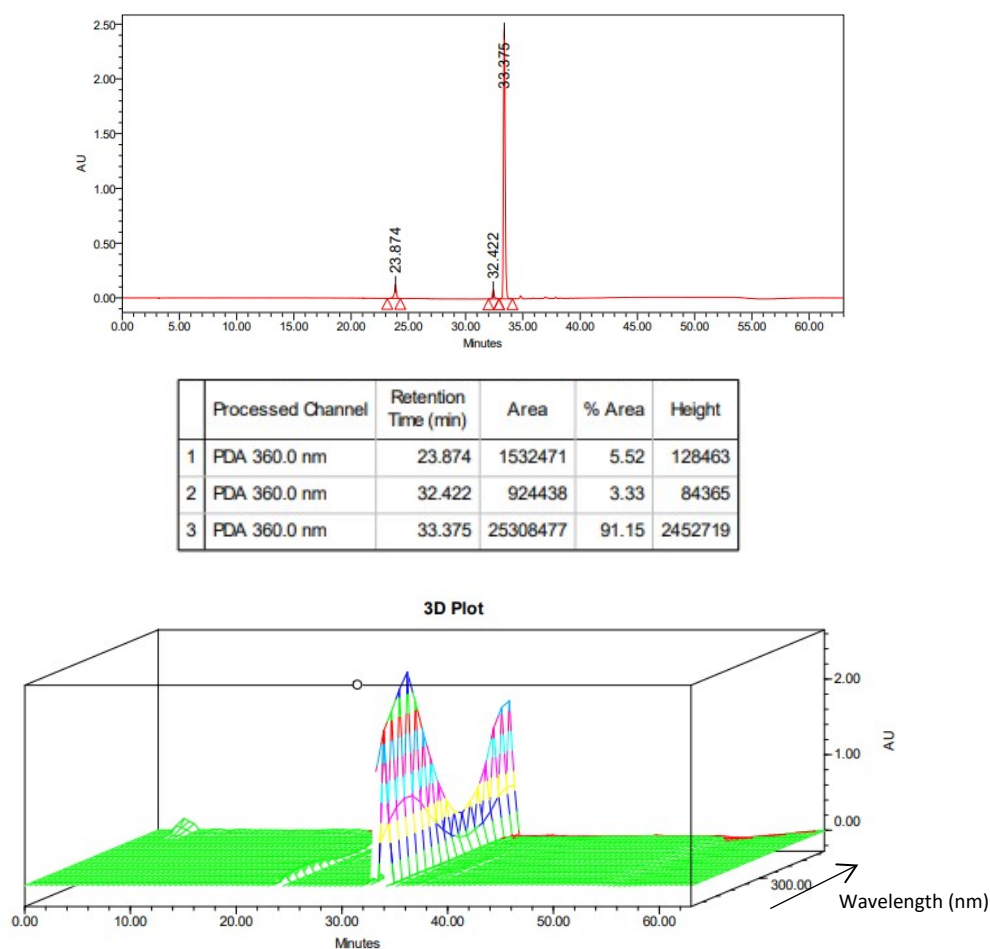

Figure S18: HPLC-UV-DAD analysis of compound **2Y**. Column: MODULO-CART QK UPTISPHERE 5 ODB 250 x 4.6 mmUP50DB-25QK. Gradient: 5% MeOH – 95 % H<sub>2</sub>O. Injection volume 20.00 ul.  $\lambda$  = 360 nm. Retention time = 33.375 min, purity = 91 %.

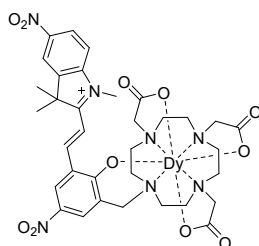

**Synthesis of 2Dy:** Into a solution of **L2** (0.17g, 0.234 mmol, 1eq), in 20 mL of methanol was added DyCl<sub>3</sub>·6H<sub>2</sub>O (0.088g, 0.234mmol, 1eq). The reaction mixture was refluxed overnight before the evaporation of solvents to dryness. The crude product was purified by silica column chromatography using CH<sub>2</sub>Cl<sub>2</sub>: CH<sub>3</sub>OH: H<sub>2</sub>O (1:4:1) as eluent to afford compound **2Dy** (0.141 g, % yield = 68 %) as a red solid.

- ESI-HR-MS (positive, MeOH):  $m/z$  calcd. for [C<sub>34</sub>H<sub>43</sub>DyN<sub>6</sub>O<sub>9</sub>]<sup>+</sup>: 421.6186 , found: 421.6192 , [M+2H]<sup>2+</sup>; calcd. for [C<sub>34</sub>H<sub>41</sub>DyN<sub>7</sub>O<sub>11</sub>]<sup>+</sup>: 887.21559 , found: 887.2159, [M+H]<sup>+</sup>
- FT-IR (cm<sup>-1</sup>, ATR): 1593 (C=O), 1514, 1311, 1242, 1204, 1111, 1084, 970, 935, 903.

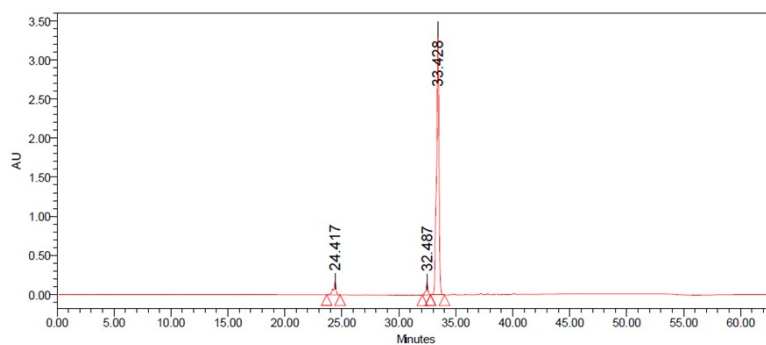

|   | Processed Channel | Retention Time (min) | Area     | % Area | Height  |
|---|-------------------|----------------------|----------|--------|---------|
| 1 | PDA 360.0 nm      | 24.417               | 2701944  | 5.10   | 172508  |
| 2 | PDA 360.0 nm      | 32.487               | 2017948  | 3.81   | 162078  |
| 3 | PDA 360.0 nm      | 33.428               | 48311001 | 91.10  | 3330572 |

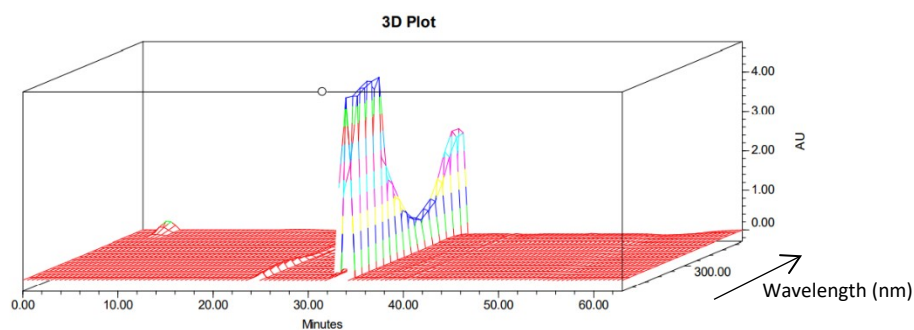

Figure S19: HPLC-UV-DAD analysis of compound **2Dy**. Column: MODULO-CART QK UPTISPHERE 5 ODB 250 x 4.6 mmUP50DB-25QK. Gradient: 5% MeOH – 95 % H<sub>2</sub>O. Injection volume 20.00 ul.  $\lambda$  = 360 nm. Retention time = 33.428 min, purity = 91 %.

## X-Ray Diffraction Analysis

**For 1Y:** ( $C_{34}H_{41}N_6O_9Y$ ,  $C_2H_3N$ );  $M = 807.69 \text{ g.mol}^{-1}$ . A suitable crystal for X-ray diffraction single crystal experiment (orange prism, dimensions =  $0.07 \times 0.090 \times 0.160 \text{ mm}$ ) was selected and mounted on the goniometer head of a D8 Venture AXS diffractometer equipped with a (CMOS) PHOTON 100 detector, [\*], Mo- $K\alpha$  radiation ( $\lambda = 0.71073 \text{ \AA}$ , multilayer monochromator),  $T = 150(2) \text{ K}$ ; Crystal structure has been described in monoclinic  $P 2_1/c$  (I.T.#14) space group. Cell parameters were refined as shown in Table S1. The structure was solved by dual-space algorithm using the *SHELXT* program,<sup>4</sup> and then refined with full-matrix least-squares methods based on  $F^2$  (*SHELXL*).<sup>5</sup> All non-hydrogen atoms were refined with anisotropic atomic displacement parameters. H atoms were finally included in their calculated positions and treated as riding on their parent atom with constrained thermal parameters. A final refinement on  $F^2$  with 8275 unique intensities and 482 parameters converged at  $\omega R(F^2) = 0.0927$  ( $R(F) = 0.0419$ ) for 7562 observed reflections with  $I > 2\sigma(I)$ .

**For 2Y:** ( $C_{34}H_{40}N_7O_{11}Y$ );  $M = 811.64 \text{ g.mol}^{-1}$ . A suitable crystal for X-ray diffraction single crystal experiment (orange plate, dimensions =  $0.330 \times 0.250 \times 0.060 \text{ mm}$ ) was selected and mounted on the goniometer head of a D8 Venture (Bruker-AXS) diffractometer equipped with a CMOS-PHOTON70 detector [\*], using Mo- $K\alpha$  radiation ( $\lambda = 0.71073 \text{ \AA}$ , graphite monochromator) at  $T = 150(2) \text{ K}$ . Crystal structure has been described in triclinic symmetry and  $P -1$  (I.T.#2) centric space group. Cell parameters have been refined as shown in Table S2. Number of formula unit  $Z$  is equal to 2 and calculated density  $d$  and absorption coefficient  $\mu$  values are  $1.214 \text{ g.cm}^{-3}$  and  $1.370 \text{ mm}^{-1}$  respectively. Crystal structure was solved by dual-space algorithm using *SHELXT* program,<sup>4</sup> and then refined with full-matrix least-squares methods based on  $F^2$  (*SHELXL*).<sup>5</sup> The contribution of the disordered solvents to the calculated structure factors was estimated following the *BYPASS* algorithm,<sup>6</sup> implemented as the *SQUEEZE* option in *PLATON*.<sup>7</sup> A new data set, free of solvent contribution, was then used in the final refinement. All non-Hydrogen atoms were refined with anisotropic atomic displacement parameters. H atoms were finally included in their calculated positions and treated as riding on their parent atom with constrained thermal parameters. A final refinement on  $F^2$  with 10132 unique intensities and 481 parameters converged at  $\omega R_F^2 = 0.1190$  ( $R_F = 0.0477$ ) for 8709 observed reflections with  $I > 2\sigma(I)$ .

**For 2Dy-H<sub>2</sub>O:** ( $C_{34}H_{42}DyN_7O_{12}[+solvent]$ );  $M = 903.24$ . A suitable crystal for X-ray diffraction single crystal experiment (red plate, dimensions =  $0.080 \times 0.130 \times 0.390 \text{ mm}$ ) was selected and mounted on the goniometer head of a D8 Venture (Bruker-AXS) diffractometer equipped with a CMOS-PHOTON70 detector, using Mo- $K\alpha$  radiation ( $\lambda = 0.71073 \text{ \AA}$ , multilayer monochromator) at  $T = 150(2) \text{ K}$ . Crystal structure has been described in monoclinic symmetry and  $C 2/c$  (I.T.#15) centric space group ( $R_{int} = 0.0557$ ). Cell parameters have been refined as follows:  $a = 52.331(6)$ ,  $b = 11.4130(13)$ ,  $c = 16.8157(19) \text{ \AA}$ ,  $\beta = 105.896(5)^\circ$ ,  $V = 9659.2(19) \text{ \AA}^3$ . Number of formula unit  $Z$  is equal to 8 and calculated density  $d$  and absorption coefficient  $\mu$  values are  $1.242 \text{ g.cm}^{-3}$  and  $1.602 \text{ mm}^{-1}$  respectively. Crystal structure was solved by dual-space algorithm using *SHELXT* program,<sup>4</sup> and then refined with full-matrix least-squares methods based on  $F^2$  (*SHELXL*).<sup>5</sup> The contribution of the disordered solvents to the calculated structure factors was estimated following the *BYPASS* algorithm,<sup>6</sup> implemented as the *SQUEEZE* option in *PLATON*.<sup>7</sup> A new data set, free of solvent contribution, was then used in the final refinement. All non-Hydrogen atoms were refined with anisotropic atomic displacement parameters. Except H12A and H12B that were introduced in the structural model through Fourier difference maps analysis, H atoms were finally included in their calculated positions and treated as riding on their parent atom with constrained thermal parameters. A final refinement on  $F^2$  with 11047 unique intensities and 496 parameters converged at  $\omega R_F^2 = 0.0824$  ( $R_F = 0.0320$ ) for 8764 observed reflections with  $I > 2\sigma(I)$ .

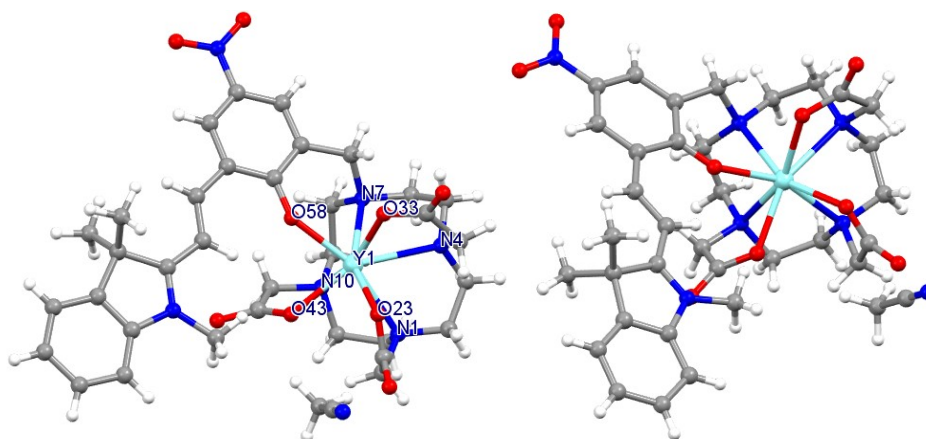

Figure S20: View of the structure of compound **1Y** obtained by SC-XRD showing the MC state of the photochromic unit (left) and the 8 coordinated Y(III) center (right).

Table S1: Crystallographic data collected for compound **1Y**.

|                                               | Compound <b>1Y</b><br><b>[Y(L1)](CH<sub>3</sub>CN)</b> |
|-----------------------------------------------|--------------------------------------------------------|
| <b>T (K)</b>                                  | 150                                                    |
| <b>Symmetry, space group</b>                  | Monoclinic, $P 2_1/c$                                  |
| <b>a, b, c (Å)</b>                            | 12.4815 (12),<br>7.6027(6),<br>38.132(3)               |
| <b><math>\beta</math> (°)</b>                 | 95.013(3)                                              |
| <b>Volume (Å<sup>3</sup>)</b>                 | 3604.6(5)                                              |
| <b>Z</b>                                      | 4                                                      |
| <b>Calculated density (g.cm<sup>-3</sup>)</b> | 1.488                                                  |

Table S2: Bond length in the coordination sphere of the metal center of compound **1Y**.

|                 | <b>Bond length (Å)</b> |
|-----------------|------------------------|
| <b>Y1 – O58</b> | 2.2552(17)             |
| <b>Y1 – O23</b> | 2.2667(18)             |
| <b>Y1 – O43</b> | 2.2959(17)             |
| <b>Y1 – O33</b> | 2.3127(18)             |
| <b>Y1 – N1</b>  | 2.571(2)               |
| <b>Y1 – N7</b>  | 2.576(2)               |
| <b>Y1 – N10</b> | 2.591(2)               |
| <b>Y1 – N4</b>  | 2.622(2)               |

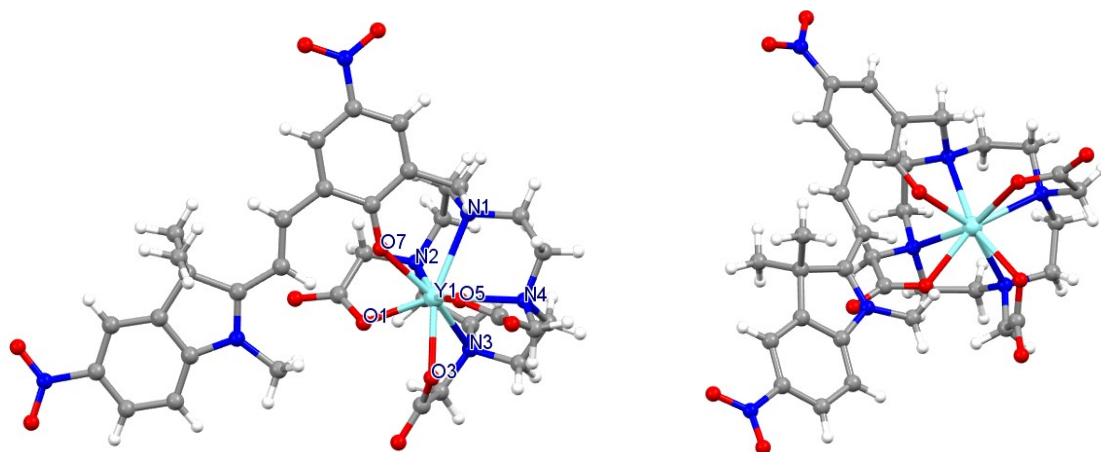

Figure S21: View of the structure of compound **2Y** obtained by SC-XRD showing the MC state of the photochromic unit (left) and the 8 coordinated Y(III) center (right).

Table S3: Crystallographic data collected for compound **2Y**.

|                                                                         | Compound <b>2Y</b> (Squeezed)<br><b>[Y(L2)]</b> |
|-------------------------------------------------------------------------|-------------------------------------------------|
| <b>T (K)</b>                                                            | 150                                             |
| <b>Symmetry, Space group</b>                                            | Triclinic, <i>P</i> -1                          |
| <b>a, b, c (Å)</b>                                                      | 9.4468(10),<br>15.103(2),<br>16.446(2)          |
| <b><math>\alpha</math>, <math>\beta</math>, <math>\gamma</math> (°)</b> | 84.413(4),<br>76.829(4),<br>76.662(4)           |
| <b>Volume (Å<sup>3</sup>)</b>                                           | 2220.6(5)                                       |
| <b>Z</b>                                                                | 2                                               |
| <b>Calculated density (g.cm<sup>-3</sup>)</b>                           | 1.214                                           |

Table S4: Bond lengths in the coordination sphere of the metal center of compound **2Y**.

|                | Bond length (Å) |
|----------------|-----------------|
| <b>Y1 - O7</b> | 2.2477(18)      |
| <b>Y1 – O5</b> | 2.292(2)        |
| <b>Y1 – O1</b> | 2.2982(19)      |
| <b>Y1 – O3</b> | 2.312(2)        |
| <b>Y1 – N1</b> | 2.563(2)        |
| <b>Y1 – N4</b> | 2.565(2)        |
| <b>Y1 – N2</b> | 2.578(2)        |
| <b>Y1 – N3</b> | 2.578(3)        |

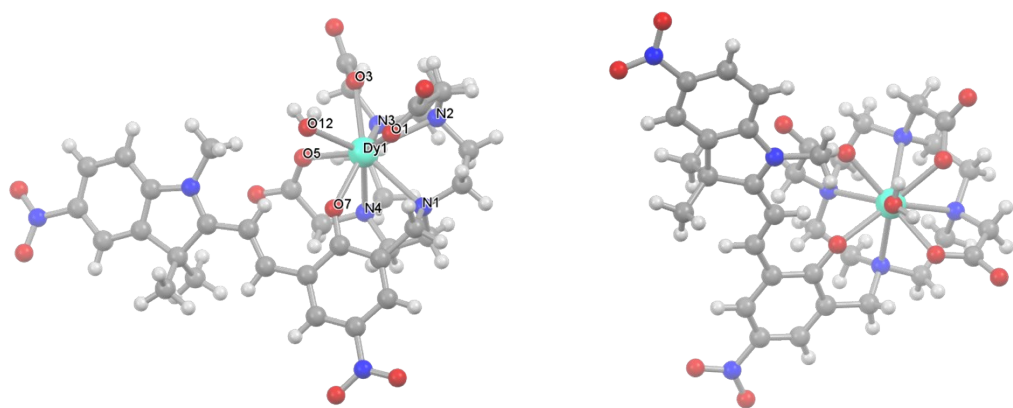

Figure S22: View of the structure of compound **2Dy-H<sub>2</sub>O** obtained by SC-XRD showing the MC state of the photochromic unit (left) and the 9 coordinated Dy(III) center (right).

Table S4: Crystallographic data collected for compound **2Dy-H<sub>2</sub>O**.

|                                               | Compound <b>2Dy-H<sub>2</sub>O</b> (Squeezed)<br><b>[Dy(L2)(H<sub>2</sub>O)]</b> |
|-----------------------------------------------|----------------------------------------------------------------------------------|
| <b>T (K)</b>                                  | 150                                                                              |
| <b>Symmetry, Space group</b>                  | Monoclinique, C2/c                                                               |
| <b>a, b, c (Å)</b>                            | 52.331(6)<br>11.4130(13)<br>16.8157(19)                                          |
| <b>β (°)</b>                                  | 105.896(5)                                                                       |
| <b>Volume (Å<sup>3</sup>)</b>                 | 9659.2(19)                                                                       |
| <b>Z</b>                                      | 8                                                                                |
| <b>Calculated density (g.cm<sup>-3</sup>)</b> | 1.242                                                                            |

Table S5: Bond lengths in the coordination sphere of the metal center of compound **2Dy-H<sub>2</sub>O**.

|                 | Bond length (Å) |
|-----------------|-----------------|
| <b>Dy1 - O7</b> | 2.3252(19)      |
| <b>Dy1 – O5</b> | 2.309(2)        |
| <b>Dy1 – O1</b> | 2.315(2)        |
| <b>Dy1 – O3</b> | 2.344(2)        |
| <b>Dy1 – N1</b> | 2.661(2)        |
| <b>Dy1 – N4</b> | 2.653(3)        |
| <b>Dy1 – N2</b> | 2.638(3)        |
| <b>Dy1 – N3</b> | 2.663(3)        |
| <b>Dy1- O12</b> | 2.477(2)        |

## Optical properties

In all cases, the samples were kept in the dark until no evolution of their spectrum occurs. Irradiations were performed with a Xenon lamp through a 450 nm or 530 nm bandpass filter (10 nm HBW) from Thorlabs company. One of these wavelengths was selected in order to match the low energy absorption band of the studied compound. The measured power of irradiation at the sample position was 3 mW for 450 nm and 1.7 mW for 530 nm. Given that the beam size is approximately 6 cm<sup>2</sup>, the irradiance was 0.5 mW.cm<sup>-2</sup> at 450 nm and 0.3 mW.cm<sup>-2</sup> at 530 nm. The same set up was used for KBr samples.

Alternatively, for **1Y** and **2Dy**, time-profiles were obtained on a homemade photokinetic setup, by monitoring the change of the absorption spectrum overtime, while the sample is continuously irradiated at 450 nm or at 530 nm, under continuous stirring (400 rpm) at T = 20°C. The temperature and stirring were controlled thanks to a Peltier device. The irradiation wavelength (source Xe lamp Zolix instruments, model Sitius 300P) was selected by passing through a monochromator (Zolix instruments, model Omni-λ200i, halfwidth of ± 10 nm). Absorption spectra were acquired with a Flame spectrophotometer (Ocean Insights) combined to a DHBAL-2000 D/Hal lamp. Light intensity was measured using a Thorlabs (PM100USB) powermeter. Experimental data are a matrix of full spectra over the full time of acquisition; useful photokinetic profiles were extracted at the maximum of absorbance of the corresponding isomer (Figures S23-S26). For the isomerization reaction investigated here, consisting of two states (equilibrium starting state **i** and after irradiation state **f**) where the equilibrium starting state to photostationary state thermal back reaction is neglected, the time evolution of the mixture composition under light irradiation is described by the general differential equation (Eq. S1):

$$\frac{dC_i(t)}{dt} = -\frac{dC_f(t)}{dt} = \phi_{i \rightarrow f} I_i^{abs}(\lambda_{irr}, t) - \phi_{f \rightarrow i} I_f^{abs}(\lambda_{irr}, t) \quad (\text{Eq. S1})$$

where  $t$  is time,  $C_i(t)$  and  $C_f(t)$  are the concentrations of equilibrium starting state **i** and after irradiation state **f**, respectively;  $\phi_{i \rightarrow f}$  and  $\phi_{f \rightarrow i}$  are the forward and return reactions quantum yields,

respectively; and  $I_i^{abs}(\lambda_{irr}, t)$  and  $I_f^{abs}(\lambda_{irr}, t)$  are the intensities of the irradiated light absorbed by equilibrium starting state and after irradiation state.

In the general case, (Eq. S1) has no analytical solution because  $I_i^{abs}(\lambda_{irr}, t)$  and  $I_f^{abs}(\lambda_{irr}, t)$  vary by several means over time. At  $t = 0$ , however, the solution contains only equilibrium starting state, and the initial parameters required to determine these intensities are known. It is also possible to neglect the back reaction since no isomerized species is present in solution yet. Under these conditions, the quantum yield  $\phi_{i \rightarrow PSS}$  can be determined from (Eq. S2):

$$\phi_{i \rightarrow f} = \frac{1}{\epsilon_f(\lambda_{obs})I_0(1 - 10^{\epsilon_i(\lambda_{irr})lC_{tot}})} \left( \frac{dA_f}{dt} \right)_{t=0} \quad (\text{Eq. S2})$$

where  $I_0$  is the initial incident photon flux  $\text{mol.photon.s}^{-1}.\text{L}^{-1}$ ,  $\epsilon_i$  is the molar extinction coefficients of equilibrium starting state **i** and  $\epsilon_f$  after irradiation state, respectively, and  $(dA_f/dt)_{t=0}$  is the initial slope of the absorbance–time curve for the isomerized form. (Eq. S2) is applied by fitting the measured absorbance curve to an exponential function and computing its derivative at  $t = 0$  to extract  $\phi_{i \rightarrow f}$ .

The thermal cycloreversion reactions were monitored by recording absorption spectra at  $T = 20^\circ\text{C}$  every 30 s with a Flame spectrophotometer (Ocean Insights) combined to a DHBAL-2000 D/Hal lamp equipped with an internal synchronized shutter.

The time-profiles were fitted with an exponential function of the kind (Eq. S3):

$$A = A_0 + A_1 e^{-kt} \quad (\text{Eq. S3})$$

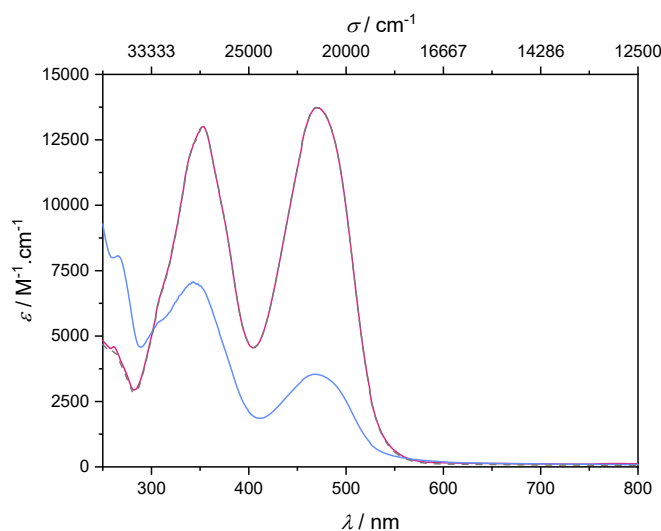

Figure S23 : Electronic absorption spectra of complex **1Y** in methanol at equilibrium state (magenta line), after irradiation (blue line) and upon resting in the dark (dotted gray line). Irradiation was performed at 450 nm ( $0.6 \text{ mW.cm}^{-2}$ ). Irradiation and resting times are as follow: 450 nm – 10 min, dark – 5 h.  $T = 20^\circ\text{C}$ ,  $C = 3.10^{-5}\text{M}$ .



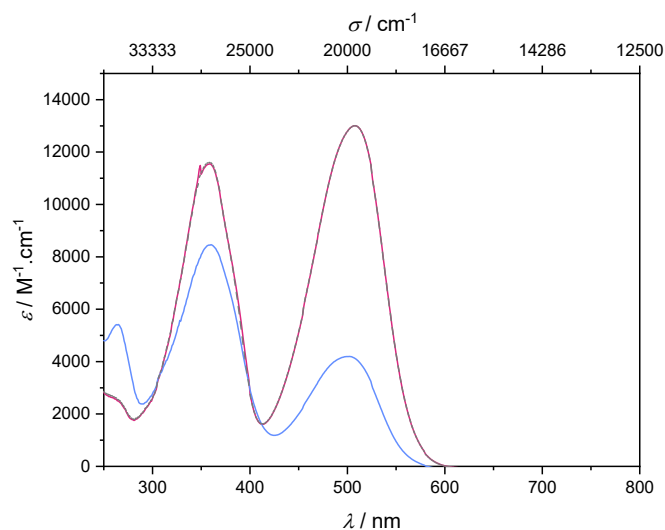

Figure S24 : Electronic absorption spectra of complex **2Dy** in methanol at equilibrium state (magenta line), after irradiation (blue line) and upon resting in the dark (dotted gray line). Irradiation was performed at 450 nm ( $0.35 \text{ mW} \cdot \text{cm}^{-2}$ ). Irradiation and resting times are as follow: 530 nm – 30 min, dark – 12 h.  $T = 20^\circ\text{C}$ ,  $C = 2 \cdot 10^{-5} \text{ M}$ .

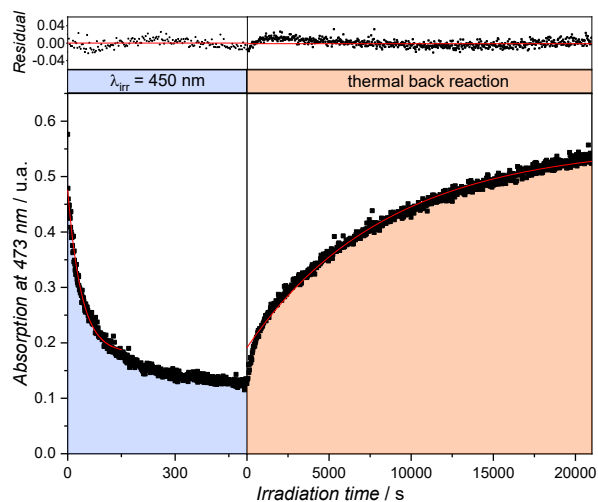

Figure S25 : Continuous absorption time–evolution profile extracted at 473 nm for **1Y** during a full cycle of photoisomerization under continuous 450 nm illumination and thermal back reaction. From this data we extract an isomerization quantum yield  $\phi_{i \rightarrow f} = 0.6 \pm 0.1$  and a thermal return constant  $k = 4.7 \cdot 10^{-5} \text{ s}^{-1}$ .

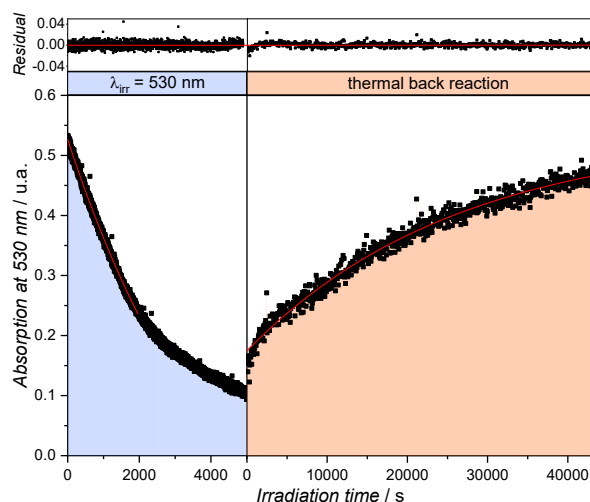

Figure S26: Continuous absorption time-evolution profile extracted at 530 nm for **2Dy** during a full cycle of photoisomerization under continuous 530 nm illumination and thermal back reaction. From this data we extract an isomerization quantum yield  $\phi_{i \rightarrow f} = 0.5 \pm 0.1$  and a thermal return constant  $k = 5.0 \cdot 10^{-6} \text{ s}^{-1}$ .

### 1- Compound 2Y:

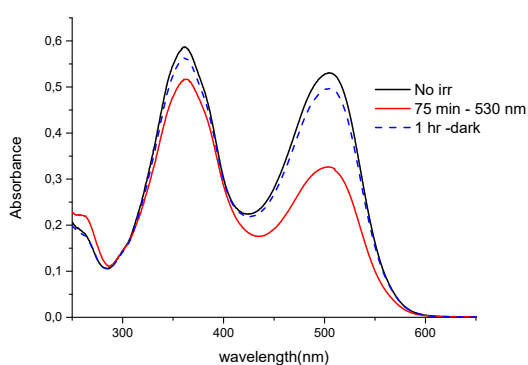

Figure S27: Absorption spectra of compound **2Y** in methanol: (black) six hours in the dark; (red) irradiated with visible light  $\lambda = 530 \text{ nm}$  for 75 min; (navy blue) then kept in the dark 1 hour.

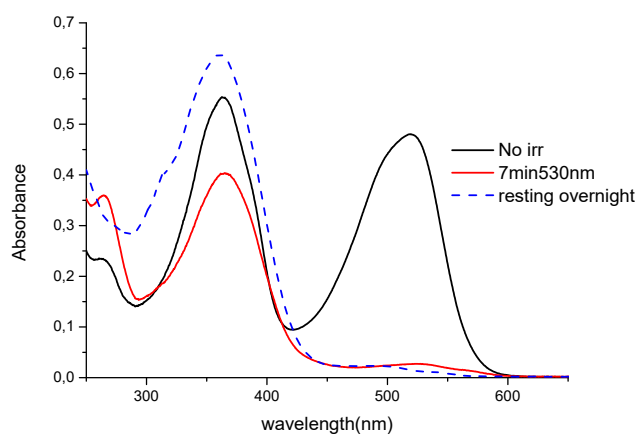

Figure S28: Absorption spectra of compound **2Y** in dichloromethane: (black) six hours in the dark; (red) irradiated with visible light 530 nm) for 7 min; (navy blue) then kept in the dark overnight.

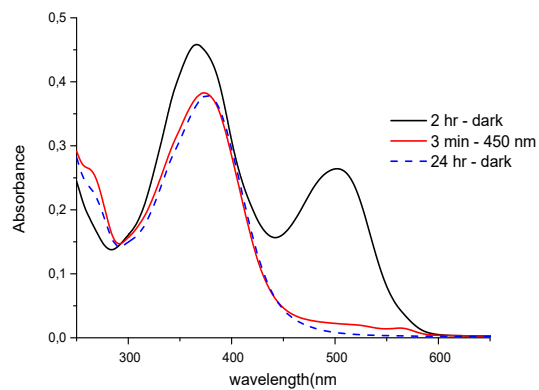

Figure S29: Absorption spectra of compound **2Y** in acetonitrile: (black) two hours in the dark; (red) irradiated with visible light (450 nm) for 3 min; (navy blue) then kept in the dark for 24 hours.

## 2- Compound 2Dy:

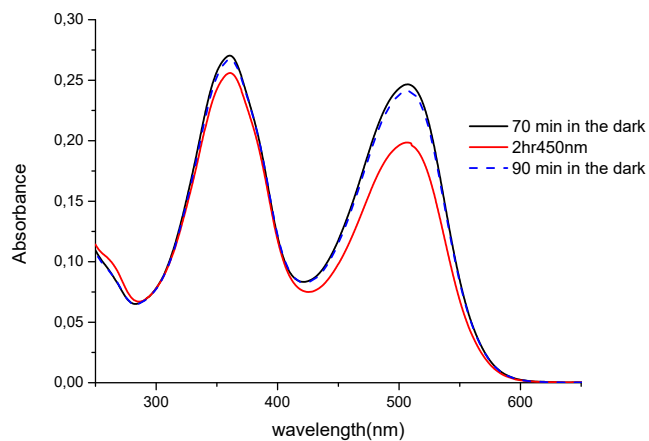

Figure S30: Absorption spectra of compound **2Dy** in methanol before irradiation/PSS (black), after light irradiation at 450 nm for 2 hours (red), and after standing in the dark for 90 minutes (navy blue).

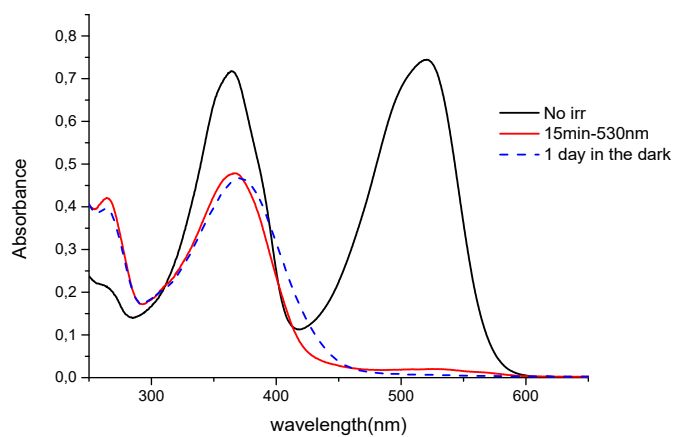

Figure S31: Absorption spectra of compound **2Dy** in dichloromethane before irradiation/PSS (black), after visible light irradiation for 15 minutes (red), and after standing in the dark for 24 hours (navy blue).

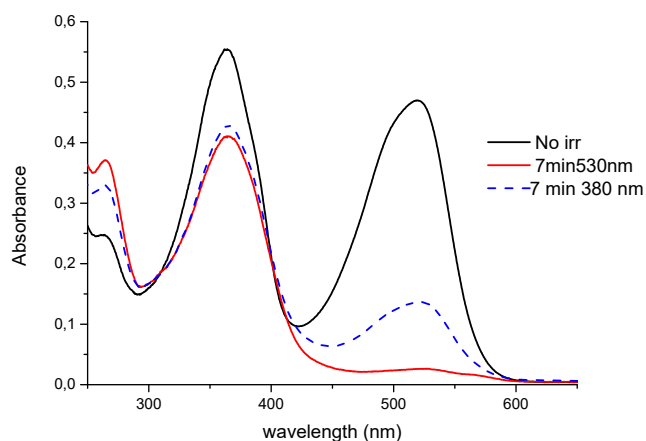

Figure S32: Absorption spectra of compound **2Dy** in dichloromethane before irradiation/PSS (black), after visible light irradiation for 7 minutes (red), and after UV light irradiation for 7 minutes (navy blue).

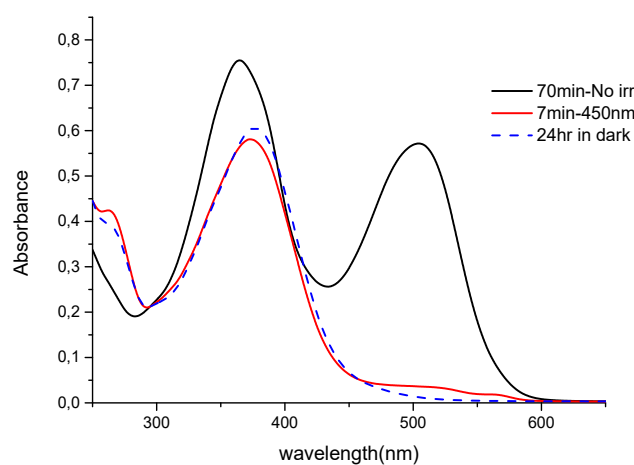

Figure S33 : Absorption spectra of compound **2Dy** in acetonitrile before irradiation/PSS (black), after visible light irradiation for 7 minutes (red), and after standing in the dark for 24 hours (navy blue).

### 3- Compound 1Y:

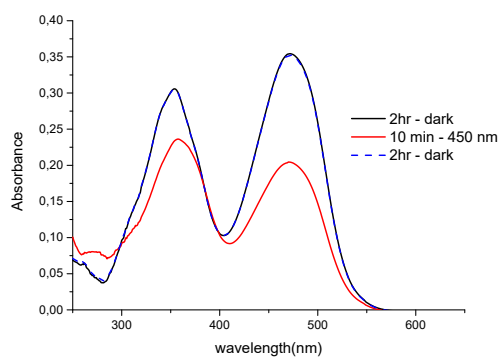

Figure S34: Absorption spectra of compound **1Y** in methanol: (black) two hours in the dark; (red) irradiated with visible light  $\lambda = 450\text{ nm}$  for 10 min; (navy blue) then kept in the dark for 2 hours.

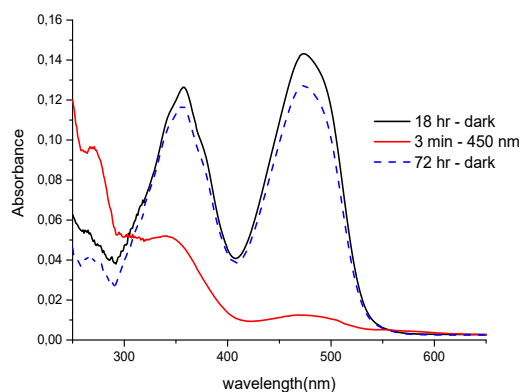

Figure S35: Absorption spectra of compound **1Y** in dichloromethane: (black) overnight in the dark; (red) irradiated with visible light  $\lambda = 450\text{ nm}$  for 3 min; (navy blue) then kept in the dark for 3 days.

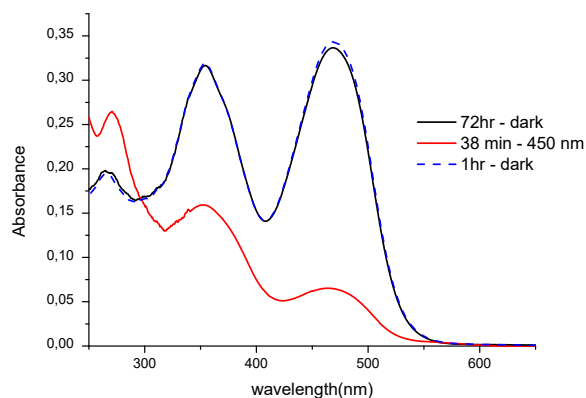

Figure S36: Absorption spectra of compound **1Y** in acetonitrile: (black) three days in the dark; (red) irradiated with visible light  $\lambda = 450\text{ nm}$  for 38 min; (navy blue) then kept in the dark for 1 hour.

#### 4- Compound **1Dy**:

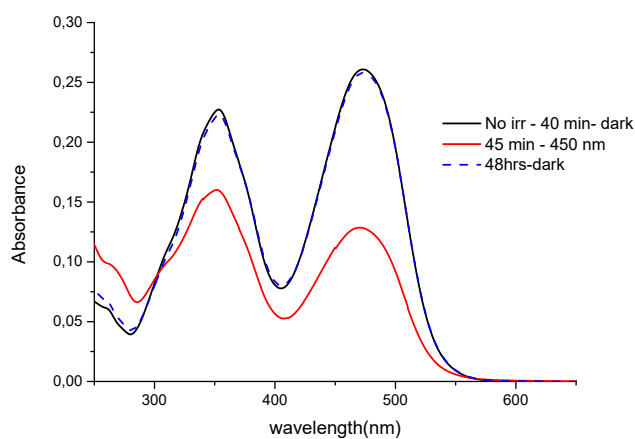

Figure S37: Absorption spectra of compound **1Dy** in methanol before irradiation/PSS (black), after light irradiation at 450 nm for 45 minutes (red), and after successively standing in the dark for 48 hours (navy blue).

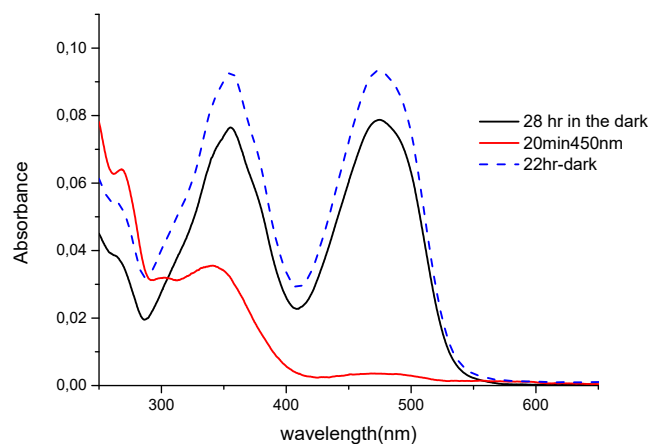

Figure S38: Absorption spectra of compound **1Dy** in dichloromethane before irradiation/PSS (black), after light irradiation at 450 nm for 20 minutes (red), and after standing in the dark for 22 hours (navy blue).

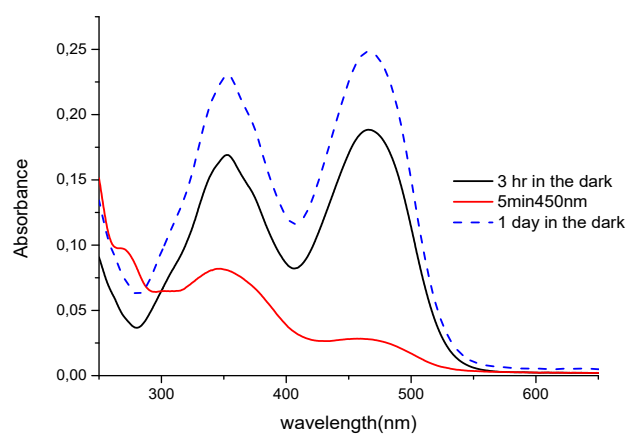

Figure S39: Absorption spectra of compound **1Dy** in acetonitrile before irradiation (black), after visible light irradiation for 5 minutes (red), and after standing in the dark for 24 hours (navy blue).

- Following of the photoisomerization of compound **1Y** by  $^1\text{H}$  NMR:

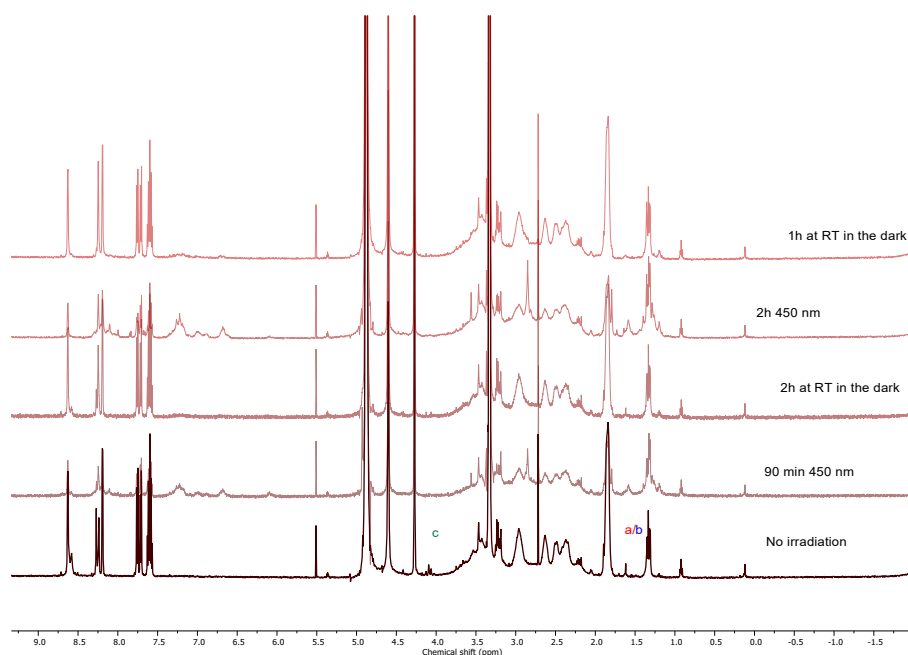

Figure S40:  $^1\text{H}$  NMR ( $\text{CD}_3\text{OD}$ , 400 MHz) of **1Y** without irradiation, after visible light irradiation at  $\lambda = 450\text{ nm}$  for 90 minutes, after storing the solution in the dark for two hours at room temperature, after two hours of light irradiation ( $\lambda = 450\text{ nm}$ ), and finally storing the solution in the dark for one hour at room temperature. Note that one alkene proton observed as a doublet at 8.61 ppm gradually disappears during the experiment, due to deuteration,<sup>8</sup> and as a consequent the second alkene proton seen at 8.24 ppm gradually turns into a singlet.

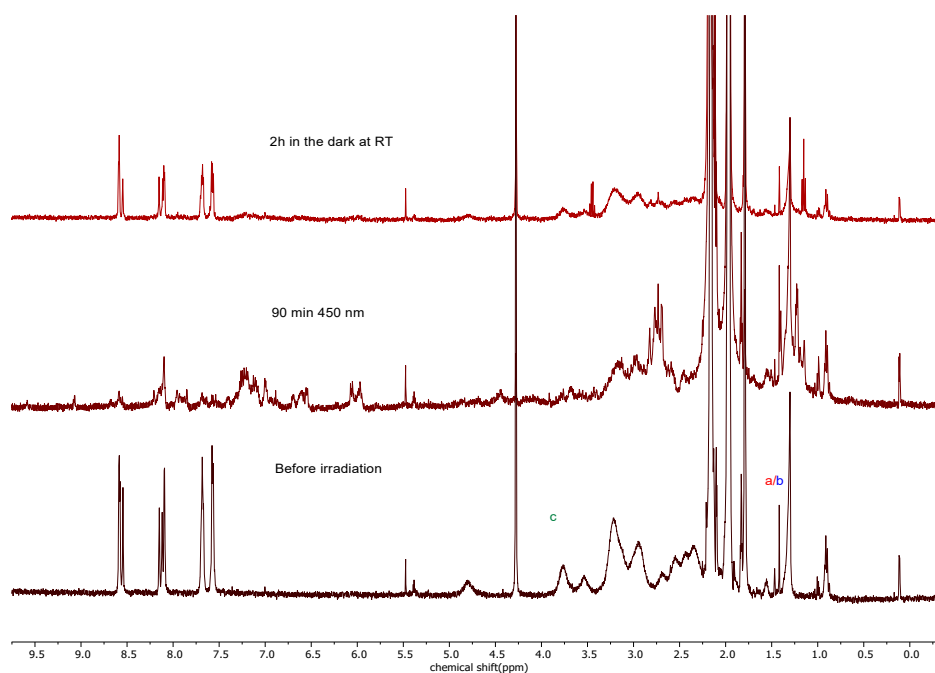

Figure S41:  $^1\text{H}$  NMR ( $\text{CD}_3\text{CN}$ , 400 MHz) of **1Y** without irradiation, after visible light irradiation at  $\lambda = 450\text{ nm}$  for 90 minutes, and after storing the solution in the dark for two hours at room temperature.

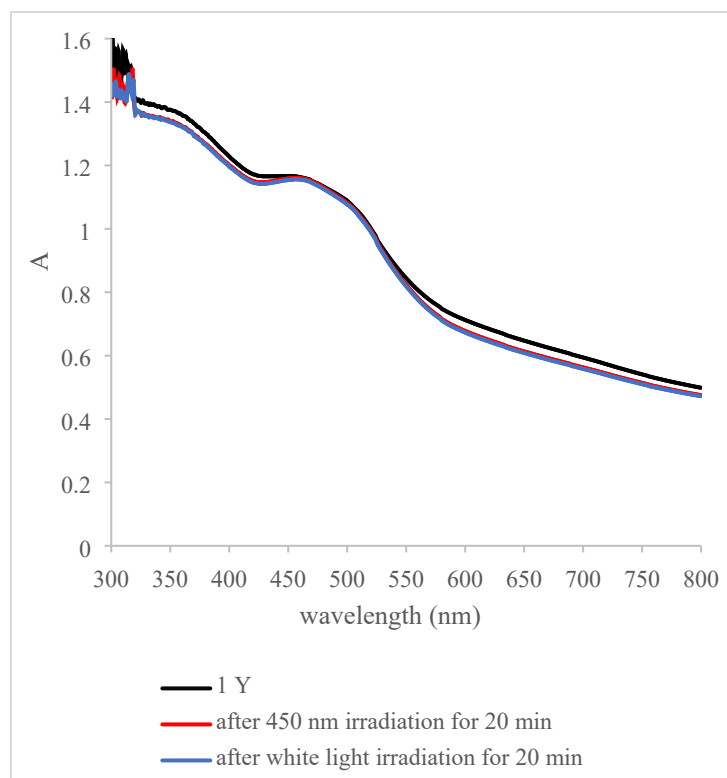

Figure S42: Absorption spectrum of **1Y** in a KBr pellet before (black line) and after 450 nm ( $3 \text{ mW.cm}^{-2}$ ) irradiation for 20 min (red line). Further irradiation with white light did not modify the spectrum (blue line).



## Theoretical Calculations

### Computational details

Wavefunction-based calculations were carried out on the optimized molecular structures (*vide infra*) of the merocyanine (left) and spiropyran (right) forms of **1Dy** complexes by using the SA-CASSCF/RASSI-SO approach, as implemented in the OpenMolcas quantum chemistry package (versions 22.10).<sup>8</sup> In this approach, the relativistic effects are treated in two steps on the basis of the Douglas–Kroll Hamiltonian. First, the scalar terms were included in the basis-set generation and were used to determine the spin-free wavefunctions and energies in the complete active space self-consistent field (CASSCF) method.<sup>9</sup> Next, spin-orbit coupling was added within the restricted-active-space-state-interaction (RASSI-SO) method, which uses the spin-free wavefunctions as basis states.<sup>10</sup> Spin-orbit (SO) integrals are calculated using the AMFI (atomic mean-field integrals) approximation.<sup>11</sup> The resulting wavefunctions and energies are used to compute the magnetic properties and g-tensors of the lowest states from the energy spectrum by using the pseudo-spin  $S = 1/2$  formalism in the SINGLE-ANISO routine.<sup>12</sup> Cholesky decomposition of the bielectronic integrals was employed to save disk space and speed-up the calculations.<sup>13</sup> The active space consisted of the nine 4f electrons of the Dy<sup>III</sup> ion spanning the seven 4f orbitals, i.e. CAS(9,7)SCF. State-averaged CASSCF calculations were performed for all of the sextets (21 roots), all of the quadruplets (224 roots), and 300 out of the 490 doublets of the Dy<sup>III</sup> ion. 21 sextets, 128 quadruplets, and 107 doublets were mixed through spin-orbit coupling in RASSI-SO. All atoms were described by ANO-RCC basis sets.<sup>14</sup> The following contractions were used: [8s7p4d3f2g1h] for Dy, [4s3p2d] for O and N, [3s2p1d] for C and [2s] for H. Geometries were optimized with the AMS program suite (revision 2019.302).<sup>15</sup> These calculations utilized the scalar all-electron zeroth-order regular approximation (ZORA)<sup>16</sup> along with the revPBE (Perdew-Burke-Ernzerhof) functional.<sup>17</sup> For all atoms, the atomic basis set corresponded to the triple- $\zeta$  polarized (TZP) Slater-type orbital (STO) all-electron basis set.<sup>18</sup> Solvent (dichloromethane, methanol) was taken into account through Conductor like Screening Model (COSMO) of solvation.<sup>19</sup>

Table S6: Calculated relative energies (in kcal.mol<sup>-1</sup>) between MC and SP forms for **1M** and **2M** (M = Y, Dy) complexes.

|            | Gas phase |      | Dichloromethane |      | Methanol |      |
|------------|-----------|------|-----------------|------|----------|------|
|            | MC        | SP   | MC              | SP   | MC       | SP   |
| <b>1Y</b>  | 0.0       | 20.4 | 0.0             | 25.1 | 0.0      | 25.2 |
| <b>1Dy</b> | 0.0       | 22.2 | 0.0             | 25.4 | 0.0      | 25.2 |
| <b>2Y</b>  | 0.0       | 17.0 | 0.0             | 18.1 | 0.0      | 17.9 |
| <b>2Dy</b> | 0.0       | 17.0 | 0.0             | 18.0 | 0.0      | 19.2 |

Table S7: Computed energies levels (the ground state is set at zero), component values of the Lande factor  $g$  and wavefunction composition for each  $M_J$  state of the ground-state multiplet for the Dy center in the merocyanine form of **1-Dy** (gas phase optimized structure). Calculations carried out at the CASSCF level.

|   | $E$ (cm <sup>-1</sup> ) | $g_x$ | $g_y$ | $g_z$ | WFT                                                                                                            |
|---|-------------------------|-------|-------|-------|----------------------------------------------------------------------------------------------------------------|
| 1 | 0.0                     | 0.0   | 0.0   | 19.8  | $0.99 \pm 15/2\rangle$                                                                                         |
| 2 | 118.1                   | 0.1   | 0.1   | 19.6  | $0.38 \pm 1/2\rangle + 0.29 \pm 3/2\rangle + 0.17 \pm 5/2\rangle$                                              |
| 3 | 224.5                   | 0.4   | 0.6   | 16.8  | $0.92 \pm 13/2\rangle$                                                                                         |
| 4 | 307.9                   | 2.2   | 2.6   | 14.2  | $0.22 \pm 11/2\rangle + 0.20 \pm 9/2\rangle + 0.19 \pm 7/2\rangle + 0.18 \pm 5/2\rangle + 0.15 \pm 3/2\rangle$ |
| 5 | 371.4                   | 8.4   | 5.3   | 0.1   | $0.51 \pm 11/2\rangle + 0.15 \pm 5/2\rangle + 0.13 \pm 7/2\rangle$                                             |
| 6 | 427.5                   | 3.5   | 6.5   | 11.3  | $0.47 \pm 9/2\rangle + 0.20 \pm 7/2\rangle + 0.15 \pm 11/2\rangle + 0.14 \pm 1/2\rangle$                       |
| 7 | 542.3                   | 0.4   | 0.6   | 16.9  | $0.29 \pm 7/2\rangle + 0.28 \pm 5/2\rangle + 0.19 \pm 9/2\rangle + 0.17 \pm 3/2\rangle$                        |
| 8 | 818.9                   | 0.0   | 0.0   | 19.8  | $0.37 \pm 1/2\rangle + 0.30 \pm 3/2\rangle + 0.19 \pm 5/2\rangle$                                              |

Table S8: Computed energies levels (the ground state is set at zero), component values of the Lande factor  $g$  and wavefunction composition for each  $M_J$  state of the ground-state multiplet for the Dy center in the spiropyran form of **1-Dy** (gas phase optimized structure). Calculations carried out at the CASSCF level.

|   | $E$ (cm <sup>-1</sup> ) | $g_x$ | $g_y$ | $g_z$ | WFT                                                                                                                                   |
|---|-------------------------|-------|-------|-------|---------------------------------------------------------------------------------------------------------------------------------------|
| 1 | 0.0                     | 0.2   | 0.3   | 18.7  | $0.86 \pm 15/2\rangle$                                                                                                                |
| 2 | 40.9                    | 0.1   | 0.2   | 18.7  | $0.22 \pm 9/2\rangle + 0.18 \pm 7/2\rangle + 0.17 \pm 5/2\rangle + 0.15 \pm 3/2\rangle + 0.13 \pm 1/2\rangle$                         |
| 3 | 107.6                   | 2.3   | 3.9   | 13.4  | $0.52 \pm 13/2\rangle + 0.14 \pm 9/2\rangle + 0.12 \pm 5/2\rangle$                                                                    |
| 4 | 143.4                   | 0.3   | 4.4   | 12.2  | $0.38 \pm 11/2\rangle + 0.17 \pm 13/2\rangle + 0.14 \pm 9/2\rangle$                                                                   |
| 5 | 210.4                   | 9.0   | 4.8   | 0.1   | $0.33 \pm 7/2\rangle + 0.12 \pm 11/2\rangle + 0.12 \pm 1/2\rangle + 0.12 \pm 13/2\rangle + 0.12 \pm 5/2\rangle + 0.11 \pm 9/2\rangle$ |
| 6 | 308.6                   | 1.9   | 4.5   | 10.5  | $0.27 \pm 9/2\rangle + 0.22 \pm 5/2\rangle + 0.17 \pm 11/2\rangle + 0.14 \pm 13/2\rangle$                                             |
| 7 | 393.4                   | 1.3   | 3.3   | 14.2  | $0.24 \pm 5/2\rangle + 0.24 \pm 3/2\rangle + 0.21 \pm 7/2\rangle + 0.11 \pm 1/2\rangle$                                               |
| 8 | 603.0                   | 0.0   | 0.1   | 19.2  | $0.48 \pm 1/2\rangle + 0.30 \pm 3/2\rangle + 0.12 \pm 5/2\rangle$                                                                     |

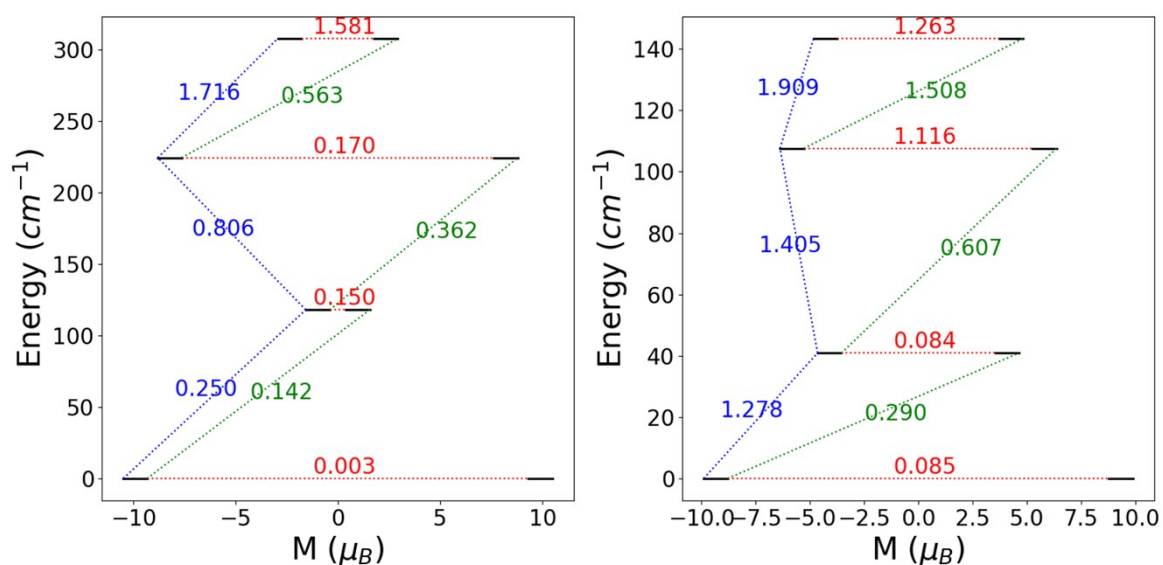

Figure S43: Energies (in  $\text{cm}^{-1}$ ) and projected  $\mu_z$  (in  $\mu_B$ ) values along the ground magnetic axis for the merocyanine (left) and spiropyran (right) forms of **1Dy**. Black lines represent the four lowest Kramer doublets of each complex. The values of the magnetic (i.e. isotropic Zeeman) transition moments between the states are given for comparison. The values in red correspond to QTM (for the GS) and TA-QTM (for the ESs) mechanisms of the magnetization relaxation, whereas blue and green values correspond to Orbach mechanisms.

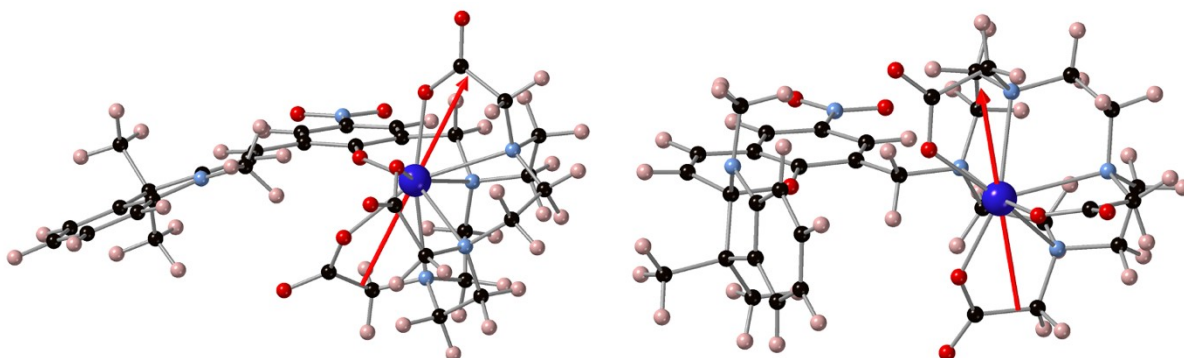

Figure S44: Anisotropy axes of the Dy(III) ions for the merocyanine (left) and spiropyran (right) forms of **1Dy**.

## Références

- (1) Tu, C.; Louie, A. Y., Photochromically-controlled, reversibly-activated MRI and optical contrast agent. *Chem. Commun.* **2007**, (13), 1331-1333.
- (2) Sakata, T.; Yan, Y. L.; Marriott, G., Family of site-selective molecular optical switches. *J. Org. Chem.* **2005**, *70* (6), 2009-2013.
- (3) Tu, C.; Osborne, E. A.; Louie, A. Y., Synthesis and characterization of a redox- and light-sensitive MRI contrast agent. *Tetrahedron* **2009**, *65* (7), 1241-1246.
- (4) Sheldrick, G., SHELXT - Integrated space-group and crystal-structure determination. *Acta Cryst. A* **2015**, *71* (1), 3-8.
- (5) Sheldrick, G., Crystal structure refinement with SHELXL. *Acta Cryst. C* **2015**, *71* (1), 3-8.
- (6) Vandersluis, P.; Spek, A. L., Bypass - an effective method for the refinement of crystal-structures containing disordered solvent regions. *Acta Cryst. A* **1990**, *46*, 194-201.
- (7) Spek, A., PLATON SQUEEZE: a tool for the calculation of the disordered solvent contribution to the calculated structure factors. *Acta Cryst. C* **2015**, *71* (1), 9-18.
- (8) Garcia, J.; Addison, J. B.; Liu, S. Z.; Lu, S.; Faulkner, A. L.; Hodur, B. M.; Balmond, E. I.; Or, V. W.; Yun, J. H.; Trevino, K.; Shen, B.; Shaw, J. T.; Frank, N. L.; Louie, A. Y., Antioxidant Sensing by Spiropyran: Substituent Effects and NMR Spectroscopic Studies. *J. Phys. Chem. B* **2019**, *123* (31), 6799-6809.
